# Supplementary material for: Computational and Empirical Studies Predict Mycobacterium tuberculosis-Specific T Cells as a Biomarker for Infection Outcome
Source: PubMed Central journal article supplement (PMC4827839; doi:10.1371/journal.pcbi.1004804), 2016-04-11
Supplement: pcbi.1004804.s018.pdf [file pcbi.1004804.s018.pdf]

| NHP ID                       | Clinical classification | k-means | Hclust-Ward | Hclust-Complete | HClust-Avg | MDS |
|------------------------------|-------------------------|---------|-------------|-----------------|------------|-----|
| 1512                         | Active                  | 1       | 1           | 1               | 1          | 1   |
| 1712                         | Active                  | 1       | 2           | 2               | 2          | 2   |
| 1812                         | Active                  | 1       | 1           | 1               | 1          | 1   |
| 2112                         | Latent                  | 2       | 3           | 3               | 3          | 3   |
| 2312                         | Latent                  | 1       | 1           | 4               | 1          | 1   |
| 2612                         | Latent                  | 1       | 1           | 5               | 4          | 1   |
| 2712                         | Latent                  | 1       | 1           | 1               | 1          | 1   |
| 17211                        | Latent                  | 1       | 1           | 4               | 1          | 1   |
| 17411                        | Active                  | 1       | 3           | 3               | 3          | 4   |
| 21310                        | Active                  | 3       | 2           | 6               | 5          | 5   |
| 21410                        | Active                  | 4       | 2           | 6               | 5          | 5   |
| 21510                        | Latent                  | 5       | 2           | 7               | 6          | 6   |
| 21610                        | Latent                  | 5       | 2           | 7               | 6          | 6   |
| 21710                        | Latent                  | 1       | 2           | 6               | 5          | 6   |
| 21810                        | Active                  | 2       | 3           | 3               | 3          | 3   |
| 21910                        | Latent                  | 2       | 3           | 3               | 3          | 3   |
| 22010                        | Active                  | 6       | 2           | 8               | 7          | 7   |
| 22210                        | Latent                  | 7       | 3           | 3               | 3          | 3   |
| 22310                        | Active                  | 1       | 2           | 9               | 8          | 4   |
| 22410                        | Latent                  | 1       | 2           | 10              | 9          | 7   |
| 22510                        | Active                  | 1       | 2           | 11              | 10         | 7   |
| 22610                        | Latent                  | 1       | 2           | 8               | 7          | 1   |
| 22710                        | Active                  | 1       | 2           | 12              | 11         | 2   |
| 22810                        | Latent                  | 8       | 2           | 13              | 12         | 2   |
| 22910                        | Active                  | 9       | 2           | 9               | 8          | 7   |
| 23010                        | Latent                  | 1       | 2           | 14              | 13         | 7   |
| 23110                        | Active                  | 1       | 2           | 11              | 14         | 5   |
| 23210                        | Active                  | 1       | 1           | 1               | 15         | 1   |
| <b>Optimal # of clusters</b> |                         | 9       | 3           | 14              | 15         | 7   |

**Table 5: results for the unsupervised classification algorithms applied to the *single cytokine dataset*** Similar multiple optimal clusters have been returned by applying the five unsupervised algorithms to the multiple cytokine and memory phenotype temporal datasets (data not shown).
