# Supplementary material for: Computational and Empirical Studies Predict Mycobacterium tuberculosis-Specific T Cells as a Biomarker for Infection Outcome
Source: PubMed Central journal article supplement (PMC4827839; doi:10.1371/journal.pcbi.1004804), 2016-04-11
Supplement: pcbi.1004804.s019.pdf [file pcbi.1004804.s019.pdf]

| Variable      | Value                                          | Units                | Description                                     |
|---------------|------------------------------------------------|----------------------|-------------------------------------------------|
| APC           | 0                                              | Cell count           | Antigen presenting cell proxy in the lymph node |
| $N_{Ln,4}$    | $N_{B,4} \times (\alpha / \text{host\_Ln})$    | Cell count           | Lymph node naïve CD4+                           |
| $P_{Ln,4}$    | 0                                              | Cell count           | Lymph node precursor CD4+                       |
| $EM_{Ln,4}$   | 0                                              | Cell count           | Lymph node effector memory CD4+                 |
| $CM_{Ln,4}$   | 0                                              | Cell count           | Lymph node central memory CD4+                  |
| $N_{B,4}$     | $[365,1213] \times \lambda$                    | Cell/mm <sup>3</sup> | Blood naïve CD4+                                |
| $E_{B,4}$     | 0                                              | Cell/mm <sup>3</sup> | Blood effector CD4+                             |
| $CM_{B,4}$    | 0                                              | Cell/mm <sup>3</sup> | Blood central memory CD4+                       |
| $EM_{B,4}$    | 0                                              | Cell/mm <sup>3</sup> | Blood effector memory CD4+                      |
| $N_{Ln,8}$    | $N_{B,8} \times (\alpha / \text{host\_Ln})$    | Cell count           | Lymph node naïve CD8+                           |
| $P_{Ln,8}$    | 0                                              | Cell count           | Lymph node precursor CD8+                       |
| $EM_{Ln,8}$   | 0                                              | Cell count           | Lymph node effector memory CD8+                 |
| $CM_{Ln,8}$   | 0                                              | Cell count           | Lymph node central memory CD8+                  |
| $N_{B,8}$     | $[117,825] \times \lambda$                     | Cell/mm <sup>3</sup> | Blood naïve CD8+                                |
| $E_{B,8}$     | 0                                              | Cell/mm <sup>3</sup> | Blood effector CD8+                             |
| $CM_{B,8}$    | 0                                              | Cell/mm <sup>3</sup> | Blood central memory CD8+                       |
| $EM_{B,8}$    | 0                                              | Cell/mm <sup>3</sup> | Blood effector memory CD8+                      |
| $N_{Ln,nc4}$  | $N_{B,nc4} \times (\alpha / \text{host\_Ln})$  | Cell count           | Non-cognate lymph node naïve CD4+               |
| $CM_{Ln,nc4}$ | $CM_{B,nc4} \times (\alpha / \text{host\_Ln})$ | Cell count           | Non-cognate lymph node central memory CD4+      |
| $N_{B,nc4}$   | $[365,1213] \times (1-\lambda)$                | Cell/mm <sup>3</sup> | Non-cognate blood naïve CD4+                    |
| $E_{B,nc4}$   | [70,662]                                       | Cell/mm <sup>3</sup> | Non-cognate blood effector CD4+                 |
| $CM_{B,nc4}$  | [136,447]                                      | Cell/mm <sup>3</sup> | Non-cognate blood central memory CD4+           |
| $EM_{B,nc4}$  | [51,325]                                       | Cell/mm <sup>3</sup> | Non-cognate blood effector memory CD4+          |
| $N_{Ln,nc8}$  | $N_{B,nc8} \times (\alpha / \text{host\_Ln})$  | Cell count           | Non-cognate lymph node naïve CD8+               |
| $CM_{Ln,nc8}$ | $CM_{B,nc8} \times (\alpha / \text{host\_Ln})$ | Cell count           | Non-cognate lymph node central memory CD8+      |
| $N_{B,nc8}$   | [117,825]                                      | Cell/mm <sup>3</sup> | Non-cognate blood naïve CD8+                    |
| $E_{B,nc8}$   | [50,486]                                       | Cell/mm <sup>3</sup> | Non-cognate blood effector CD8+                 |
| $CM_{B,nc8}$  | [52,658]                                       | Cell/mm <sup>3</sup> | Non-cognate blood central memory CD8+           |
| $EM_{B,nc8}$  | 11,179]                                        | Cell/mm <sup>3</sup> | Non-cognate blood effector memory CD8+          |

**Table 2.** The initial conditions used in the blood and lymph node ODE compartments.  $1 \text{ mm}^3 = 0.001 \text{ ml} = 1 \mu\text{l}$
