# Supplementary material for: Computational and Empirical Studies Predict Mycobacterium tuberculosis-Specific T Cells as a Biomarker for Infection Outcome
Source: PubMed Central journal article supplement (PMC4827839; doi:10.1371/journal.pcbi.1004804), 2016-04-11
Supplement: pcbi.1004804.s020.pdf [file pcbi.1004804.s020.pdf]

| Parameter         | Value                                                 | Units                    | Description                                            |
|-------------------|-------------------------------------------------------|--------------------------|--------------------------------------------------------|
| $\alpha$          | 5.6e5                                                 | $\mu\text{L}$            | Conversion factor from Blood to Ln (max. blood volume) |
| host_Ln           | 50                                                    | count                    | Number of lymph nodes in the host                      |
| $\lambda$         | [1e-5, 1e-3]                                          | ""                       | Mtb-specific frequency                                 |
| Sn4*              | $N_{Ln,4} \times (\alpha / \text{host\_Ln})$          | Cell/ $\mu\text{L}$ *day | Thymic output of naive CD4 cells                       |
| Sn8*              | $N_{Ln,8} \times (\alpha / \text{host\_Ln})$          | Cell/ $\mu\text{L}$ *day | Thymic output of naive CD8 cells                       |
| hs <sub>1</sub>   | 25                                                    | Cell count               | Naive CD4 recruitment half saturation                  |
| hs <sub>4</sub>   | 10                                                    | Cell count               | Precursor CD4 proliferation half saturation            |
| hs <sub>5</sub>   | 10                                                    | Cell count               | Precursor CD4 differentiation half saturation          |
| hs <sub>8</sub>   | 40                                                    | Cell count               | Central Memory CD4 recruitment half saturation         |
| hs <sub>10</sub>  | 357.7                                                 | Cell count               | Naive CD8 recruitment half saturation                  |
| hs <sub>11</sub>  | 10                                                    | Cell count               | Naive CD8 priming half saturation                      |
| hs <sub>13</sub>  | 10                                                    | Cell count               | Precursor CD8 proliferation half saturation            |
| hs <sub>14</sub>  | 10                                                    | Cell count               | Precursor CD8 differentiation half saturation          |
| hs <sub>17</sub>  | 157                                                   | Cell count               | Central Memory CD8 recruitment half saturation         |
| k <sub>1</sub>    | [5e-1,1]                                              | day <sup>-1</sup>        | Naive CD4 recruitment rate                             |
| k <sub>2</sub>    | [1e-3,1e-1]                                           | day <sup>-1</sup>        | Naive CD4 Priming rate                                 |
| k <sub>3</sub>    | [1e-7,1e-4]                                           | day <sup>-1</sup>        | Central Memory CD4 reactivation rate                   |
| k <sub>4</sub>    | [.5,1.5]                                              | day <sup>-1</sup>        | Precursor CD4 proliferation rate                       |
| k <sub>5</sub>    | [0.01,0.5]                                            | day <sup>-1</sup>        | Precursor CD4 differentiation to Effector rate         |
| k <sub>6</sub>    | 0.004                                                 | day <sup>-1</sup>        | Precursor CD4 differentiation to Central Memory        |
| k <sub>7</sub>    | [0.005,0.1]                                           | day <sup>-1</sup>        | Effector CD4 differentiation to Effector Memory        |
| k <sub>8</sub>    | [0.1,0.31]                                            | day <sup>-1</sup>        | Central Memory CD4 recruitment rate                    |
| k <sub>10</sub>   | [5e-1,1]                                              | day <sup>-1</sup>        | Naive CD8 recruitment rate                             |
| k <sub>11</sub>   | [1e-3,1e-1]                                           | day <sup>-1</sup>        | Naive CD8 priming rate                                 |
| k <sub>12</sub>   | [1e-7,1e-4]                                           | day <sup>-1</sup>        | Central Memory CD8 reactivation rate                   |
| k <sub>13</sub>   | [.5,1.5]                                              | day <sup>-1</sup>        | Precursor CD8 proliferation rate                       |
| k <sub>14</sub>   | [0.01,0.5]                                            | day <sup>-1</sup>        | Precursor CD8 differentiation to Effector rate         |
| k <sub>15</sub>   | 0.004                                                 | day <sup>-1</sup>        | Precursor CD8 differentiation to Central Memory        |
| k <sub>16</sub>   | [0.005,0.1]                                           | day <sup>-1</sup>        | Effector CD8 differentiation to Effector Memory        |
| k <sub>17</sub>   | 0.5                                                   | day <sup>-1</sup>        | Central Memory CD8 recruitment rate                    |
| $\mu_1$           | 0.2                                                   | day <sup>-1</sup>        | Effector CD4 death rate                                |
| $\mu_2$           | 0.04                                                  | day <sup>-1</sup>        | Effector Memory CD4 death rate                         |
| $\mu_3$           | 0.2                                                   | day <sup>-1</sup>        | Effector CD8 death rate                                |
| $\mu_4$           | 0.04                                                  | day <sup>-1</sup>        | Effector Memory CD8 death rate                         |
| $\mu_5$           | [0.1,1]                                               | day <sup>-1</sup>        | APC death rate                                         |
| $\mu_6$           | 0.1                                                   | day <sup>-1</sup>        | Precursor CD4 death rate                               |
| $\mu_7$           | 0.1                                                   | day <sup>-1</sup>        | Precursor CD8 death rate                               |
| $\mu_8$           | 6e-4                                                  | day <sup>-1</sup>        | Naive CD4 death rate                                   |
| $\mu_9$           | 4e-4                                                  | day <sup>-1</sup>        | Naive CD8 death rate                                   |
| $\rho_1$          | 3e8                                                   | Cell count               | Precursor carrying capacity                            |
| Wp <sub>4</sub>   | 0.735                                                 | ""                       | Weight factor for Precursor CD4 in CD8 priming         |
| $\xi_1^*$         | $\xi_2 \times (N_{Ln,nc4} / N_{B,nc4}) / \alpha$      | day <sup>-1</sup>        | Naive CD4 Lymph Influx                                 |
| $\xi_2$           | [0.637,1]                                             | day <sup>-1</sup>        | Naive CD4 Lymph Efflux                                 |
| $\xi_3$           | [2,5]                                                 | day <sup>-1</sup>        | Effector CD4 Lymph Efflux                              |
| $\xi_4^*$         | $\xi_5 \times (CM_{Ln,nc4} / CM_{B,nc4}) / \alpha$    | day <sup>-1</sup>        | Central Memory CD4 Lymph Influx                        |
| $\xi_5$           | 0.489                                                 | day <sup>-1</sup>        | Central Memory CD4 Lymph Efflux                        |
| $\xi_6$           | [2,5]                                                 | day <sup>-1</sup>        | Effector Memory CD4 Lymph Efflux                       |
| $\xi_7^*$         | $\xi_8 \times (N_{Ln,nc8} / N_{B,nc8}) / \alpha$      | day <sup>-1</sup>        | Naive CD8 Lymph Influx                                 |
| $\xi_8$           | [0.643,1]                                             | day <sup>-1</sup>        | Naive CD8 Lymph Efflux                                 |
| $\xi_9$           | [2,5]                                                 | day <sup>-1</sup>        | Effector CD8 Lymph Efflux                              |
| $\xi_{10}^*$      | $\xi_{11} \times (CM_{Ln,nc8} / CM_{B,nc8}) / \alpha$ | day <sup>-1</sup>        | Effector CD8 Lymph Influx                              |
| $\xi_{11}$        | [2,5]                                                 | day <sup>-1</sup>        | Central Memory CD8 Lymph Efflux                        |
| $\xi_{12}$        | [2,5]                                                 | day <sup>-1</sup>        | Effector Memory CD8 Lymph Efflux                       |
| proliferationTime | 8                                                     | hrs                      | Doubling time for cognate T cells in the lung          |
| maxDivisions      | 4                                                     | --                       | Max number of divisions for T cells in the lung        |

**Supplementary Table 9.** The baseline parameters used in the blood, lymph node ODE compartments. \*Parameters calculated based upon the initial conditions of the system and the corresponding lymph efflux term. These parameters were not varied during LHS experiments as they were constrained by a corresponding lymph efflux parameter and the assumption that our initial conditions meet homeostasis.
