# Supplementary material for: Computational and Empirical Studies Predict Mycobacterium tuberculosis-Specific T Cells as a Biomarker for Infection Outcome
Source: PLoS Comput Biol. 2016 Apr 11;12(4):e1004804. doi: 10.1371/journal.pcbi.1004804 (PMC4827839; doi:10.1371/journal.pcbi.1004804)
Supplement: S4 Table — (XLSX) [file pcbi.1004804.s015.xlsx]

## Sheet: Combined_CD4CD8MemoryCytokine_v
M.No	Stim	Timepoint in days	CD4/CM/GMCSF	CD4/EM/GMCSF	CD4/Naive/GMCSF	CD4/TD/GMCSF	CD4/CM/IFNg	CD4/EM/IFNg	CD4/Naive/IFNg	CD4/TD/IFNg	CD4/CM/IL-10	CD4/EM/IL-10	CD4/Naive/IL-10	CD4/TD/IL-10	CD4/CM/IL-17	CD4/EM/IL-17	CD4/Naive/IL-17	CD4/TD/IL-17	CD4/CM/IL-2	CD4/EM/IL-2	CD4/Naive/IL-2	CD4/TD/IL-2	CD4/CM/IL-6	CD4/EM/IL-6	CD4/Naive/IL-6	CD4/TD/IL-6	CD4/CM/TNF	CD4/EM/TNF	CD4/Naive/TNF	CD4/TD/TNF	CD4/CM/IL-4	CD4/EM/IL-4	CD4/Naive/IL-4	CD4/TD/IL-4	CD8/CM/GMCSF	CD8/CM/IFNg	CD8/CM/IL-10	CD8/CM/IL-17	CD8/CM/IL-2	CD8/CM/IL-4	CD8/CM/IL-6	CD8/CM/TNF	CD8/EM/GMCSF	CD8/EM/IFNg	CD8/EM/IL-10	CD8/EM/IL-17	CD8/EM/IL-2	CD8/EM/IL-4	CD8/EM/IL-6
1512	ESAT-6 and CFP-10	0	ND	ND	ND	ND	0	0	0.156	0.0885	0.235	0.287	0.065	0.221	0.683	0.753	0.533	0.442	0	0.0359	0.234	0.531	0.0641	0.144	0.078	0.0442	0.662	0.251	0.689	0.973	ND	ND	ND	ND	ND	0.0524	0.393	0.89	0	ND	0.0786	0.628	ND	0	0.0585	0.585	0.176	ND	0.117
1512	ESAT-6 and CFP-10	10	ND	ND	ND	ND	0.192	0.151	0.563	0.509	0.32	0.202	0.163	0.509	0.597	0.454	0.175	0.509	0.192	0.252	0.3	1.34	1.24	1.51	0.376	0.878	0.149	0.858	0.15	0.647	ND	ND	ND	ND	ND	0.0199	0.397	0.0993	0.0397	ND	0.0794	0.0397	ND	0	0.308	0.308	0.154	ND	0.0769
1512	ESAT-6 and CFP-10	20	ND	ND	ND	ND	0.0289	0.0159	0.115	0.0641	0.127	0.111	0.148	0.139	0.254	0.349	0.392	0.385	0.168	0.445	0.623	3.42	0.0866	0.0318	0.0831	0.0428	0.0635	0.23	0.106	0.15	ND	ND	ND	ND	ND	0.0275	0.0643	0.275	0.441	ND	0	0.0918	ND	0.0262	0.0917	0.288	1.66	ND	0.0131
1512	ESAT-6 and CFP-10	30	ND	ND	ND	ND	0.0822	0.044	0.153	0.0792	0.282	0.527	0.133	0.206	0.388	0.484	0.357	0.507	0.0117	0.022	0.216	1.14	0.247	0.242	0.0903	0.143	0.2	0.308	0.251	0.998	ND	ND	ND	ND	ND	0.744	0.0266	0.106	0.0266	ND	0.173	0.212	ND	0.517	0.0235	0.0235	0.282	ND	0.094
1512	ESAT-6 and CFP-10	42	ND	ND	ND	ND	0.435	0.387	0.329	0.232	0.526	0.696	0.516	0.729	0.345	0.387	0.373	0.497	0.218	0.541	0.636	1.95	0.471	0.696	0.329	0.331	0.363	0.657	0.505	1.69	ND	ND	ND	ND	ND	0.287	0.64	0.221	0.353	ND	0.463	0.199	ND	0.507	0.724	0.362	1.16	ND	0.507
1512	ESAT-6 and CFP-10	56	ND	ND	ND	ND	1.07	0.809	0.664	0.324	2.31	4.45	2.15	2.48	2.42	2.46	2.31	2.32	0.789	1.36	0.478	2.16	2.03	2.98	2.05	1.94	0.451	2.68	0.106	0.108	ND	ND	ND	ND	ND	1.16	1.44	0.877	0.438	ND	3.41	0.376	ND	0.627	1.6	1.03	2.05	ND	4.16
1512	ESAT-6 and CFP-10	90	ND	ND	ND	ND	0.84	0.749	0.322	0.0476	0.372	0.718	0.322	0.429	0.812	1.16	0.696	1.05	0.248	0.343	0.312	1.64	1.68	1.9	0.977	1.24	0.964	3.4	0.752	4.05	ND	ND	ND	ND	ND	0.448	0.584	0.869	0.272	ND	1.24	0.312	ND	0.43	0.574	0.909	0.956	ND	1.53
1512	ESAT-6 and CFP-10	120	ND	ND	ND	ND	0.462	0.48	1.57	1.67	0.334	0.523	0.45	0.439	14.7	15	14.2	18.5	0.0257	0.174	0.0818	0.395	7.06	7.06	4.29	4.56	30	54.5	18.8	36.4	ND	ND	ND	ND	ND	2.23	0.0752	9.02	0.0501	ND	5.99	20.6	ND	2.11	0	10.1	0.728	ND	6.41
1512	ESAT-6 and CFP-10	150	ND	ND	ND	ND	0.39	0.262	1.33	1.02	1.59	2.4	1.41	1.75	1.93	2.62	2.24	2.22	0.781	2.45	0.228	1.49	1.17	2.1	1.45	1.41	1.12	4.81	0.435	0.0853	ND	ND	ND	ND	ND	0.25	1.08	1.37	0.541	ND	0.625	0.75	ND	0.438	0.548	1.1	2.3	ND	0.548
1512	ESAT-6 and CFP-10	180	ND	ND	ND	ND	0.695	1.04	1.65	1.63	1.59	1.97	1.5	2.47	0.913	1.04	1.06	1.67	0.587	1.97	0.419	1.12	1.2	0.869	1.08	1.12	3.13	13.8	1.85	10.4	ND	ND	ND	ND	ND	0.878	1.55	0.961	0.627	ND	1.04	2.55	ND	1.1	2.08	1.53	1.53	ND	0.767
1712	ESAT-6 and CFP-10	0	ND	ND	ND	ND	0.129	0.34	1.36	0.887	1.89	1.47	1.12	1.31	0.601	0.227	0.745	0.54	0.0859	0	0.545	2.39	6.23	6.12	4.95	5.4	0.644	0.68	0.977	2.85	ND	ND	ND	ND	ND	0.227	2.27	0.68	0.34	ND	8.15	0.34	ND	0	1.56	0.521	0	ND	10.4
1712	ESAT-6 and CFP-10	10	ND	ND	ND	ND	0.885	0.678	2.77	1.18	1.69	1.36	0.445	0.673	1.43	1.24	0.426	0.462	0.13	0.339	0.352	1.18	1.17	0.452	0.297	0.378	0.989	3.5	0.158	0.631	ND	ND	ND	ND	ND	1.17	1.71	0.961	0.427	ND	2.45	0.427	ND	0	0.699	0.699	1.4	ND	1.4
1712	ESAT-6 and CFP-10	20	ND	ND	ND	ND	0.516	0.247	0.143	0.0513	0.314	0.68	0.931	0.565	4.17	3.37	3.4	3.03	0.291	0.68	0.931	3.85	1.5	1.58	1.65	1.08	0.717	3.77	0.179	1.28	ND	ND	ND	ND	ND	0.162	0.378	3.67	0.54	ND	0.756	0.702	ND	0.313	0.417	3.54	1.35	ND	0.521
1712	ESAT-6 and CFP-10	120	ND	ND	ND	ND	0.752	0.503	1.03	0.398	0.869	1.21	0.582	0.373	0.916	1.51	1.61	1.54	0.282	0.453	0.0813	0.448	1.95	2.42	1.71	1.24	1.67	3.57	1.18	1.37	ND	ND	ND	ND	ND	0.407	0.407	1.02	0.102	ND	1.02	0.916	ND	0.611	1.63	1.63	0.815	ND	2.04
1712	ESAT-6 and CFP-10	150	ND	ND	ND	ND	1.46	0.435	1.91	0.87	1.3	1.7	1.01	0.819	1.12	1.36	1.57	0.643	0.667	1.08	0.21	0.681	0.991	1.25	1.17	0.63	2.44	2.23	2.95	1.05	ND	ND	ND	ND	ND	1.41	0.972	0.565	0.0941	ND	0.596	1.63	ND	0.748	1.25	0.748	0.847	ND	0.598
1712	ESAT-6 and CFP-10	180	ND	ND	ND	ND	1.07	1.69	1.43	1.27	1.42	1.35	0.887	0.472	3.49	2.76	2.41	1.96	0.498	1.41	0.349	1.38	3.27	3.55	3.01	2.51	0.854	5.92	0.475	2.58	ND	ND	ND	ND	ND	1.3	0.745	3.35	0.745	ND	2.98	0.745	ND	1.74	2.09	2.78	1.39	ND	3.48
1812	ESAT-6 and CFP-10	0	ND	ND	ND	ND	0.938	0.752	2.32	2.33	0.448	0.486	0.188	0.467	0.234	0.354	0.178	0.518	0.81	1.37	1.25	5.29	0.277	0.309	0.119	0.0518	0.703	1.37	1.09	5.29	ND	ND	ND	ND	ND	1.64	0.506	0.253	0.464	ND	0.464	1.01	ND	0.652	0	0.109	2.72	ND	0.326
1812	ESAT-6 and CFP-10	10	ND	ND	ND	ND	0.36	0.274	1.15	0.601	3.1	3.77	0.885	0.847	0.999	1.2	0.428	0.3	0.2	0.206	0.486	1.56	0.24	0.72	0.181	0.109	1.3	6.07	0.66	3.66	ND	ND	ND	ND	ND	0.323	2.38	0.848	0.525	ND	0.768	0.848	ND	0.187	3.17	0.934	1.03	ND	0.654
1812	ESAT-6 and CFP-10	20	ND	ND	ND	ND	0.0951	0.13	0.105	0.0699	0.197	0.154	0.102	0.131	0.272	0.246	0.215	0.341	0.245	0.591	0.707	2.26	0.17	0.177	0.158	0.175	0.543	4.16	0.564	4.47	ND	ND	ND	ND	ND	0.0749	0.412	0.487	0.243	ND	0.374	0.543	ND	0.125	0.523	0.523	1.15	ND	0.423
1812	ESAT-6 and CFP-10	30	ND	ND	ND	ND	0.287	0.379	0.392	0.3	0.631	1.45	0.325	0.563	0.86	0.896	0.536	0.976	0.086	0.172	0.842	4.06	0.459	0.586	0.459	0.601	0.315	0.551	0.239	1.43	ND	ND	ND	ND	ND	0.24	1.6	0.32	0.56	ND	0.4	0.0799	ND	0.152	0.761	0.457	1.37	ND	0.761
1812	ESAT-6 and CFP-10	42	ND	ND	ND	ND	0.312	0.239	0.214	0.0471	0.0693	0.191	0.112	0.157	0.416	0.597	0.858	0.659	0.0866	0.143	0.49	1.54	0.208	0.167	0.378	0.329	0.502	1.65	0.817	1.96	ND	ND	ND	ND	ND	0.2	0.25	0.601	0.2	ND	0.15	0.35	ND	0	0	0.54	0.216	ND	0.324
1812	ESAT-6 and CFP-10	56	ND	ND	ND	ND	0.482	0.378	0.359	0.224	0.778	1.2	0.51	0.898	0.233	0.441	0.22	0.18	0.42	0.788	0.544	1.84	0.0467	0.0945	0.0579	0.0449	0.638	2.33	0.232	1.48	ND	ND	ND	ND	ND	0.617	0.845	0.325	0.357	ND	0.0325	0.422	ND	0.231	0.692	0.462	2.08	ND	0
1812	ESAT-6 and CFP-10	90	ND	ND	ND	ND	0.826	1.02	0.349	0.157	0.413	0.668	0.232	0.296	0.315	0.314	0.335	0.383	0.0885	0.334	0.221	1.24	0.324	0.373	0.254	0.226	0.413	1.55	0.537	2.65	ND	ND	ND	ND	ND	0	0	0	0.135	ND	0	0.0673	ND	0	0	0	0.824	ND	0
1812	ESAT-6 and CFP-10	120	ND	ND	ND	ND	0.414	0.249	1.68	0.824	0.614	0.566	0.64	0.455	0.2	0.317	0.777	0.284	0.246	1.02	0.436	1.42	0.399	0.226	0.695	0.114	1.63	4.41	2.26	3.92	ND	ND	ND	ND	ND	0.479	0.539	0.24	0.36	ND	0.33	0.629	ND	0.43	0.645	0.502	1.36	ND	0.215
1812	ESAT-6 and CFP-10	150	ND	ND	ND	ND	1.19	0.933	2.37	1.47	1.91	2.33	0.734	0.847	3.28	4.03	1.75	1.36	0.909	2.8	0.261	1.73	3.03	3.6	1.14	1.07	0.606	3.65	0.659	0.921	ND	ND	ND	ND	ND	1.07	2.28	4.63	0.604	ND	3.02	0.537	ND	1.43	1.63	4.9	3.06	ND	4.49
1812	ESAT-6 and CFP-10	180	ND	ND	ND	ND	0.542	0.66	1.38	1.7	0.181	0.51	0.23	0.179	1.67	2.07	1.58	1.48	0.339	1.59	0.39	1.3	1.99	2.04	1.54	1.21	0.609	4.23	0.918	4.51	ND	ND	ND	ND	ND	0.836	0.209	2.37	0.209	ND	2.02	0.696	ND	0.333	0.666	2.44	1.22	ND	2.44
2112	ESAT-6 and CFP-10	0	ND	ND	ND	ND	0.0358	0.043	0.629	0.248	0.287	0.279	0.144	0.34	0.556	0.451	0.784	0.66	0.0179	0	0.613	1.02	0.233	0.193	0.335	0.217	0.376	1.42	0.588	0.712	ND	ND	ND	ND	ND	0.041	0.287	0.369	0	ND	0.41	0.287	ND	0.0612	0.367	0.306	0.306	ND	0.551
2112	ESAT-6 and CFP-10	10	ND	ND	ND	ND	0.867	0.305	5.06	2.95	0.289	0.509	1.46	1.15	0	0.102	1.27	0.903	0	2.85	0.506	2.94	4.62	4.88	9.01	7.44	3.18	18.2	2	10.8	ND	ND	ND	ND	ND	0.378	0.0944	0.189	0.142	ND	0.472	0.519	ND	0.34	0.068	0.238	1.26	ND	0.408
2112	ESAT-6 and CFP-10	20	ND	ND	ND	ND	0	0	1.3	0.846	3.02	2.31	1.95	2.09	2.48	3.22	2.37	2.23	3.34	5.38	2.81	9.3	1.21	1.2	0.753	0.874	2.04	6.96	4.31	17.8	ND	ND	ND	ND	ND	0	2.25	2.15	4.99	ND	1.96	1.66	ND	0	2.86	1.3	8.05	ND	1.82
2112	ESAT-6 and CFP-10	30	ND	ND	ND	ND	0	0.0642	1.43	0.951	7.8	7	3.52	3.76	9.23	8.79	4.8	5.16	1.01	3.15	0.659	3.5	2.55	1.73	1.49	1.52	5.84	18.9	1.18	6.44	ND	ND	ND	ND	ND	0	4.5	4.5	1.85	ND	2.81	3.86	ND	0	4.91	3.47	5.2	ND	2.31
2112	ESAT-6 and CFP-10	42	ND	ND	ND	ND	2.04	2.55	1.18	0.463	1.09	0.638	0.786	0.694	1.9	0.797	0.982	1.16	0.952	1.28	0.196	3.24	1.77	2.07	0.982	2.31	2.31	9.09	0.393	1.16	ND	ND	ND	ND	ND	1.21	1.62	0.405	0.405	ND	2.43	0.81	ND	0.8	4.8	0.8	4.8	ND	1.6
2112	ESAT-6 and CFP-10	56	ND	ND	ND	ND	0.879	1.03	0.57	0.206	0.562	0.471	0.557	0.484	0.366	0.235	1.28	1.27	0.782	2.4	0.471	2.13	0.953	0.792	1.63	1.46	0.537	1.37	0.409	2.08	ND	ND	ND	ND	ND	0.959	0.604	0.355	0.959	ND	0.462	0.213	ND	0.561	0.281	0.312	5.24	ND	0.156
2112	ESAT-6 and CFP-10	90	ND	ND	ND	ND	3.49	2.32	1.45	0.565	2.02	2.37	1.01	1.01	1.88	1.98	1.17	1.63	0.672	1.92	0.565	1.6	5.06	4.69	1.74	1.55	1.61	5.59	1.37	6.24	ND	ND	ND	ND	ND	3.08	1.09	0.694	0.794	ND	1.88	0.496	ND	1.97	0.716	0.716	1.79	ND	3.04
2112	ESAT-6 and CFP-10	120	ND	ND	ND	ND	2.12	2.47	2.01	1.39	1.91	1.67	0.719	0.695	5.81	5.08	3.27	3.35	1.32	3.59	0.543	2.09	4.97	4.21	1.89	1.88	0.557	1.5	0.792	2.73	ND	ND	ND	ND	ND	1.74	1.14	4.2	0.96	ND	3.48	0.66	ND	0.859	1.23	6.26	4.05	ND	2.94
2112	ESAT-6 and CFP-10	150	ND	ND	ND	ND	0.126	0.0541	0.0118	0	0.084	0.108	0.101	0.0456	0.112	0.216	0.148	0.114	24.4	36.8	99.2	99.4	0.91	1.03	0.68	0.547	12.7	27.5	96.8	99	ND	ND	ND	ND	ND	0	0.0897	0.0897	73.4	ND	0.807	52.6	ND	0	0.0566	0.0566	78.7	ND	0.736
2112	ESAT-6 and CFP-10	180	ND	ND	ND	ND	4.69	4.69	0.43	0	2.01	1.31	0.82	0.192	0.221	0.0438	0.74	0	0	0	2.08	0	2.58	2.15	1.64	0.767	0.0736	0	2.62	0	ND	ND	ND	ND	ND	0.605	0.924	0.319	0	ND	2.04	0.0319	ND	2.47	0.756	0.137	0	ND	1.92
2312	ESAT-6 and CFP-10	0	ND	ND	ND	ND	0.101	0.0473	0.3	0.108	0.322	0.248	0.0468	0.0309	0.212	0.272	0.524	0.432	0	0.0118	0.257	0.262	0.304	0.213	0.3	0.0926	0.111	0.26	0.3	0.339	ND	ND	ND	ND	ND	0	0.188	0.151	0	ND	0.151	0.0502	ND	0	0.212	0.0705	0.0353	ND	0.106
2312	ESAT-6 and CFP-10	10	ND	ND	ND	ND	2.25	1.36	5.91	3.71	2.72	2.11	2.93	2.87	0.573	0.994	2.35	2.34	0.717	4.37	1.2	5.83	10.6	9.79	10.1	10.3	5.49	27.5	2.83	13.4	ND	ND	ND	ND	ND	0.644	0.286	0.608	0.322	ND	1.43	0.895	ND	0.458	0.296	0.431	1.83	ND	1.4
2312	ESAT-6 and CFP-10	20	ND	ND	ND	ND	0	0	1.93	1.03	2.48	1.93	0.625	1.03	1.76	1.66	1.25	1.2	2.62	5.84	3.6	9.99	1.78	1.58	0.828	1.54	2.07	7.15	3.6	13	ND	ND	ND	ND	ND	0	1.67	1.11	3.3	ND	2.19	1.41	ND	0	1.42	1.27	9.15	ND	1.65
2312	ESAT-6 and CFP-10	30	ND	ND	ND	ND	0.0209	0.372	1.31	1.39	3.72	4.58	0.663	1.53	3.85	3.26	0.398	0.995	1.17	2.85	1.08	5.51	7.7	8.22	1.81	2.99	8.09	25.8	0.779	4.45	ND	ND	ND	ND	ND	0	2.8	1.11	1.53	ND	6.1	4.99	ND	0	2.78	0.782	4.6	ND	5.65
2312	ESAT-6 and CFP-10	42	ND	ND	ND	ND	2.04	2.41	1.14	0.216	3.18	4.28	3.91	4.11	0.827	1.1	1.95	2.38	0.573	1.65	1.3	3.25	2.48	2.09	1.95	1.95	3.76	13.7	1.3	1.3	ND	ND	ND	ND	ND	1.42	2.89	0.531	1.06	ND	1.59	1.77	ND	1.13	2.7	0.676	4.05	ND	1.35
2312	ESAT-6 and CFP-10	56	ND	ND	ND	ND	0.419	0.266	0.388	0.063	0.44	0.335	0.226	0.205	0.0839	0.0694	0.0646	0.205	0.524	0.949	0.404	1.48	0.65	0.659	0.517	0.394	0.965	1.74	0.694	1.58	ND	ND	ND	ND	ND	0.191	0.508	0.159	0.286	ND	0.762	0.667	ND	0.0968	0.363	0.0726	1.77	ND	0.798
2312	ESAT-6 and CFP-10	90	ND	ND	ND	ND	0.21	0.343	0.393	0.0369	0.0493	0.0403	0.0562	0.148	1.13	1.29	1.08	0.96	0.9	2.42	1.52	3.92	4.39	4.56	1.59	2.11	1.38	3.19	1.56	3.18	ND	ND	ND	ND	ND	0	0.0579	1.07	1.22	ND	3.5	0.753	ND	0	0	1.13	4.07	ND	4.47
2312	ESAT-6 and CFP-10	120	ND	ND	ND	ND	1.17	1.31	1.17	0.471	2.24	2.35	0.703	0.628	1.96	1.8	0.908	1.16	1.44	3.7	1.1	3.08	0.996	0.74	0.513	0.377	0.762	2.66	0.937	4.68	ND	ND	ND	ND	ND	0.971	1.11	1.43	1.27	ND	0.706	0.494	ND	0.877	1.21	1.28	4.92	ND	0.506
2312	ESAT-6 and CFP-10	150	ND	ND	ND	ND	0.935	0.677	2.27	1.42	0.46	0.268	0.829	0.158	0.0857	0.0817	0.654	0.188	0	0	0.0872	1.26	0.717	0.688	1.13	0.43	0.0623	0.0583	0.785	1.9	ND	ND	ND	ND	ND	0.861	0.224	0.103	0	ND	0.775	0.0344	ND	0.732	0.28	0.0932	0	ND	0.732
2312	ESAT-6 and CFP-10	180	ND	ND	ND	ND	1.09	0.612	0.698	0.283	0.972	0.306	0.721	0.567	0.387	0.0383	1.43	0.283	0	0	4.53	0	3.32	2.79	2.93	1.42	0.167	0.0765	8.08	0.567	ND	ND	ND	ND	ND	0.569	1.15	0.422	0	ND	5.15	0.0975	ND	0.297	0.378	0.081	0	ND	3.81
2612	ESAT-6 and CFP-10	0	ND	ND	ND	ND	0.732	0.314	2.18	1.24	0.499	0.524	0.238	1.04	0.865	0.785	0.834	2.28	0.266	0.785	1.87	6.64	0.432	0.576	0.476	0.415	0.632	0.314	1.35	5.19	ND	ND	ND	ND	ND	0.795	0.353	0.751	0.949	ND	0.177	0.419	ND	0.98	0.196	0.49	3.04	ND	0.196
2612	ESAT-6 and CFP-10	10	ND	ND	ND	ND	0.567	0.211	1.26	0.751	3.28	4.64	0.491	0.601	1.36	2.18	0.311	0.526	0.086	0.281	0.458	1.28	0.585	0.809	0.18	0.225	2.56	9.29	0.769	4.65	ND	ND	ND	ND	ND	0.319	1.94	0.471	0.182	ND	0.851	1.34	ND	0.164	2.46	0.656	1.23	ND	0.902
2612	ESAT-6 and CFP-10	20	ND	ND	ND	ND	0.0964	0.107	0.0929	0.0889	0.123	0.213	0.151	0.178	0.219	0.194	0.255	0.207	0.351	0.581	1.33	3.56	0.0175	0	0.0696	0.119	0.456	2.11	0.499	2.93	ND	ND	ND	ND	ND	0.0498	0.0997	0.135	0.498	ND	0	0.199	ND	0.0307	0.199	0.291	2.08	ND	0
2612	ESAT-6 and CFP-10	30	ND	ND	ND	ND	0.471	0.48	0.698	0.486	1.62	2.91	0.327	0.583	0.392	0.446	0.371	0.194	0.314	0.48	1.74	8.45	0.288	0.583	0.327	0.486	0.523	1.41	0.676	3.4	ND	ND	ND	ND	ND	0.473	1.83	0.169	0.981	ND	0.406	0.372	ND	0.36	1.98	0.541	2.97	ND	0.27
2612	ESAT-6 and CFP-10	42	ND	ND	ND	ND	0.185	0.128	0.308	0.0939	0.303	0.328	0.735	0.532	0.152	0.157	0.451	0.563	0.286	0.457	1.21	2.25	0.269	0.186	0.783	0.438	0.387	1.01	0.783	2.85	ND	ND	ND	ND	ND	0.152	0.317	0.124	0.537	ND	0.234	0.303	ND	0.121	0.29	0.0724	1.86	ND	0.217
2612	ESAT-6 and CFP-10	56	ND	ND	ND	ND	0	0.0779	0.125	0	48.9	52.5	27.2	30.1	1.18	1.87	0.938	0.9	0.193	0.779	0.656	2.1	0.3	0.467	0.344	0	0.107	0.156	0.188	0.6	ND	ND	ND	ND	ND	0	57.9	0.958	0.215	ND	0.264	0.0991	ND	0.0622	54	1.06	0.747	ND	0.871
2612	ESAT-6 and CFP-10	90	ND	ND	ND	ND	1.69	3.02	0.468	0.127	0.478	0.579	0.259	0.137	0.223	0.289	0.689	0.243	0.541	1.86	0.689	1.35	5.57	1.94	0.486	0.106	28.3	7.11	1.15	1.47	ND	ND	ND	ND	ND	0.701	0.651	0.45	0.3	ND	0.601	1.15	ND	0.785	0.698	0.436	2.36	ND	0.262
2612	ESAT-6 and CFP-10	120	ND	ND	ND	ND	0.131	0.174	1.88	0.592	1.95	1.71	1.74	1.84	0.131	0.116	1.26	0.414	0.206	0.58	0.485	1.95	0.187	0.174	0.856	0.474	8.27	18.6	8.45	21.4	ND	ND	ND	ND	ND	0.218	1.38	0.158	0.198	ND	0.139	2.98	ND	0.165	1.55	0.0659	1.42	ND	0.0329
2612	ESAT-6 and CFP-10	150	ND	ND	ND	ND	0.0844	0	0.993	0.741	1.06	1.17	1.12	0.926	1.35	1.77	2.27	2.22	1.55	5.64	1.21	2.31	0.793	1	1.71	0.648	0.253	2.23	0.9	0.648	ND	ND	ND	ND	ND	0.118	0.6	0.922	1.49	ND	0.504	0.332	ND	0.124	0.84	1.37	4.29	ND	0.716
2612	ESAT-6 and CFP-10	180	ND	ND	ND	ND	0.214	0.235	0.715	0.972	1.22	1.15	1.26	0.648	0.877	1.01	1.56	0.81	0.898	2.89	0.673	2.43	0.641	0.681	1.3	0.567	0.449	1.64	0.336	1.7	ND	ND	ND	ND	ND	0.361	1.07	0.976	0.831	ND	0.705	0.253	ND	0.281	1.01	0.9	3.04	ND	0.647
2712	ESAT-6 and CFP-10	0	ND	ND	ND	ND	0.0453	0	0.0607	0.0243	0.544	0.341	0.152	0.0728	0.181	0.213	0.243	0.0243	0	0	0.121	0.728	0.0907	0	0.106	0	0.907	0.128	0.607	0.534	ND	ND	ND	ND	ND	0	0.326	0.163	0	ND	0.0814	0.163	ND	0	0.451	0.225	0.225	ND	0.225
2712	ESAT-6 and CFP-10	10	ND	ND	ND	ND	0.0948	0.139	2.7	1.49	2.94	4.25	1.14	1.45	2.18	3.23	1.26	1.35	0.664	1.76	0.471	2.03	2.32	2.45	0.694	0.845	1.23	6.65	0.173	1.18	ND	ND	ND	ND	ND	0.187	4.12	2.15	1.59	ND	4.21	0.749	ND	0	5.85	4.58	3.63	ND	5.85
2712	ESAT-6 and CFP-10	20	ND	ND	ND	ND	0.4	0.394	0.186	0.178	0.3	0.409	0.25	0.364	3.04	3.54	2.9	3.03	0	0.0303	0.0715	0.506	2.9	2.89	1.44	1.35	0.8	4.39	0.279	1.88	ND	ND	ND	ND	ND	1.52	0.456	3.99	0.076	ND	2.2	1.37	ND	2.95	0.701	4.42	0.221	ND	2.51
2712	ESAT-6 and CFP-10	30	ND	ND	ND	ND	0.341	0.142	0.507	0.124	0.17	0.154	0.136	0.0866	0.17	0.283	0.487	0.328	0.0244	0.206	0.533	1.82	0.463	0.348	0.435	0.161	0.39	1.24	0.481	0.625	ND	ND	ND	ND	ND	0.756	0.175	0	0.116	ND	0.582	0.814	ND	0.834	0.351	0.219	0.702	ND	0.615
2712	ESAT-6 and CFP-10	42	ND	ND	ND	ND	1.75	1.3	0.32	0.127	0.2	0.252	0.434	0.19	0.1	0.036	0.594	0.888	0.5	1.44	0.64	2.09	0.35	0.396	0.274	0.317	0.85	1.84	0.754	1.8	ND	ND	ND	ND	ND	1.82	0.182	0.303	0.909	ND	0.303	0.606	ND	1.9	0.317	0.19	3.23	ND	0.317
2712	ESAT-6 and CFP-10	56	ND	ND	ND	ND	1.84	1.47	0.373	0.0913	0.946	1.2	0.373	0.402	0.331	0.438	0.466	0.274	0.237	0.637	0.326	0.95	0.946	0.996	0.466	0.603	0.52	2.79	0.248	1	ND	ND	ND	ND	ND	1.81	0.952	0.317	0.272	ND	0.544	0.544	ND	0.947	0.77	0.178	0.414	ND	0.947
2712	ESAT-6 and CFP-10	90	ND	ND	ND	ND	0.532	0.871	0.68	0.154	1.06	0.871	0.614	0.926	0.384	0.234	1.03	1.39	0.148	0.404	1.87	5.92	0.34	0.255	0.734	0.309	0.636	1.74	1.85	6.48	ND	ND	ND	ND	ND	0.593	1.1	0.26	0.38	ND	0.173	0.32	ND	0.263	1.13	0.211	1.16	ND	0.132
2712	ESAT-6 and CFP-10	120	ND	ND	ND	ND	0.121	0.14	0.646	0.224	1.21	2	0.931	1.01	0.202	0.14	0.362	0.224	0.243	0.807	0.155	0.896	0.405	0.351	0.491	0.299	5.87	12.5	2.43	7.39	ND	ND	ND	ND	ND	0.684	2.22	0.0855	0	ND	0.769	6.32	ND	0.307	1.54	0.614	1.84	ND	0.154
2712	ESAT-6 and CFP-10	150	ND	ND	ND	ND	0.508	0.193	2.08	1.19	3.87	3.35	1.37	0.651	4.13	4.25	2.23	1.12	1.78	7.02	0.371	1.77	3.24	3.54	1.8	1.48	1.21	3.61	0.6	0.181	ND	ND	ND	ND	ND	0.76	4.13	5.32	1.3	ND	4.23	0.76	ND	0.167	3.18	6.19	5.18	ND	3.68
2712	ESAT-6 and CFP-10	180	ND	ND	ND	ND	0.656	0.175	1.72	1.37	2.84	2.74	1.56	1.06	3.21	3.15	2.4	2.31	1.6	3.68	0.559	1.2	0.51	0.175	0.519	0.31	3.72	18.1	1.72	8.51	ND	ND	ND	ND	ND	0.598	3.49	2.49	1.49	ND	0.797	3.19	ND	1.07	3.31	5.92	4.85	ND	0.237
17211	ESAT-6 and CFP-10	0	ND	ND	ND	ND	0.118	0.0252	1.72	0.706	5.09	4.72	3.13	3.77	16.8	15.9	17.6	16.3	0.118	0.757	1.13	4.49	15.8	15.6	10.6	11.6	0.471	4.64	0.379	2.48	ND	ND	ND	ND	ND	0	1.02	4.68	0	ND	11.4	0	ND	0	1.03	2.79	0.882	ND	8.68
17211	ESAT-6 and CFP-10	10	ND	ND	ND	ND	0.693	0.965	4.41	3.03	2.31	1.29	2.69	2.42	0	0.322	1.28	1.28	1.39	4.34	0.985	5.62	5.77	7.4	9.13	7.57	15	48.4	6.07	24.9	ND	ND	ND	ND	ND	0.403	0.134	0.134	0.168	ND	1.04	0.773	ND	0.306	0.263	0.263	1.97	ND	1.01
17211	ESAT-6 and CFP-10	20	ND	ND	ND	ND	0	0.0721	2.71	1.51	2.02	1.98	0.682	0.458	2.27	1.55	1.4	1.6	0.541	1.77	1.17	4.63	1.08	0.685	0.431	0.476	0.65	0.288	0.912	2.25	ND	ND	ND	ND	ND	0.514	1.98	2.57	1.69	ND	2.06	0.734	ND	0.0963	1.16	1.64	4.82	ND	1.83
17211	ESAT-6 and CFP-10	30	ND	ND	ND	ND	0.145	0.609	2.55	1.2	12.5	13.7	2.41	2.71	6.05	5.45	0.973	0.988	0.29	1.13	0.382	1.4	5.76	6.58	1.34	1.47	2.76	11.7	0.197	1.12	ND	ND	ND	ND	ND	0.401	4.94	1.78	0.757	ND	2.05	0.134	ND	0.185	4.26	1.3	2.28	ND	1.97
17211	ESAT-6 and CFP-10	42	ND	ND	ND	ND	2.14	2.37	0.702	0.403	2.38	3.89	3.41	4.13	1.43	1.97	4.01	4.73	2.32	5.63	1.6	3.73	2.26	2.87	1.1	2.72	1.37	5.75	0.401	1.61	ND	ND	ND	ND	ND	2.55	5.31	1.49	2.76	ND	2.12	0.425	ND	1.07	7.86	1.43	5.36	ND	4.29
17211	ESAT-6 and CFP-10	56	ND	ND	ND	ND	1.08	1.2	0.407	0.235	0.242	0.133	0.144	0.176	0.512	0.342	0.491	0.508	0.323	1.29	0.252	1.03	0.889	0.951	0.563	0.518	0.62	0.742	0.443	0.86	ND	ND	ND	ND	ND	0.59	0.337	0.337	0.337	ND	1.18	0.337	ND	0.739	0.0739	0.295	1.77	ND	0.739
17211	ESAT-6 and CFP-10	90	ND	ND	ND	ND	3.57	2.31	1.58	0.816	2.37	2.58	1.2	1.05	0.829	1.09	0.695	0.842	1.37	4.13	0.417	1.8	5.29	5.52	2.31	2.42	1.43	4.59	1.27	3.62	ND	ND	ND	ND	ND	1.83	1.7	0.655	1.18	ND	2.88	1.18	ND	2.2	1.2	0.399	3.99	ND	2.59
17211	ESAT-6 and CFP-10	120	ND	ND	ND	ND	3.99	3.9	2.69	1.43	2.55	3.27	0.551	0.667	2.26	2.36	0.844	1.5	0.822	3.48	0.491	2.2	1.73	2.01	0.593	0.617	0.36	0.752	0.509	2.08	ND	ND	ND	ND	ND	4.39	2.99	2.93	0.998	ND	1.6	0.333	ND	3.38	2.65	2.92	3.65	ND	1.37
17211	ESAT-6 and CFP-10	150	ND	ND	ND	ND	4.11	2.93	4.57	2.12	1.13	1.16	0.776	0.448	0.183	0.193	0.228	0.232	0	0	0.514	1.7	0.467	0.387	0.401	0.328	0.193	0.221	1.71	5.26	ND	ND	ND	ND	ND	4.17	0.689	0.0985	0	ND	0.427	0.0328	ND	3.3	0.632	0.211	0	ND	0.772
17211	ESAT-6 and CFP-10	180	ND	ND	ND	ND	5.88	6.84	0.465	0	3.09	1.72	1.23	0.782	0.1	0.0337	0.806	0	0	0.0337	2.14	0	2.29	1.96	2	1.43	0.0251	0	1.97	0	ND	ND	ND	ND	ND	0.824	1.86	0.0422	0	ND	2.18	0	ND	2.51	2.06	0	0	ND	2.26
17411	ESAT-6 and CFP-10	0	ND	ND	ND	ND	0.223	0.278	2.07	1.49	2.68	2.5	1.14	1.49	1.78	3.06	2.17	2.13	0	0.556	1.41	4.89	1.45	6.94	1.63	1.06	0.669	1.39	1.63	4.68	ND	ND	ND	ND	ND	0	0	0	0	ND	0.318	0.212	ND	0	0.254	0	0	ND	0.254
17411	ESAT-6 and CFP-10	10	ND	ND	ND	ND	0.353	0.208	3.06	2.27	1.05	0.705	3.8	3.29	0.113	0.0641	1.73	2.22	0.177	1.67	1.26	5.81	4.9	4.53	10.4	8.21	5.6	25.7	2.78	10.4	ND	ND	ND	ND	ND	0.0936	0.14	0.14	0.0156	ND	0.468	0.609	ND	0.0662	0.121	0.11	0.342	ND	0.276
17411	ESAT-6 and CFP-10	20	ND	ND	ND	ND	0	0	0.209	0.156	0.61	0.597	0.241	0.331	2.11	2.06	1.69	1.83	0.071	0.141	1	4.24	0.501	0.543	0.424	0.564	1.17	4.38	2.5	11.5	ND	ND	ND	ND	ND	0.0237	0.572	1.96	0.359	ND	0.679	1.11	ND	0.0638	0.459	1.93	1.39	ND	0.587
17411	ESAT-6 and CFP-10	30	ND	ND	ND	ND	0.849	0.823	1.67	1.68	2.04	2.55	0.583	1.04	3.85	3.72	1.19	1.6	0.993	1.57	1.01	2.08	2.08	1.92	0.885	0.919	2.33	11.2	0.958	6.23	ND	ND	ND	ND	ND	0.667	2.68	2.32	1.06	ND	2.38	1.18	ND	0.582	2.51	2.37	2.33	ND	1.93
17411	ESAT-6 and CFP-10	42	ND	ND	ND	ND	2.09	2.36	1.1	0.735	0.574	0.358	0.367	1.1	2.98	2	4.16	4.41	1.15	1.15	1.96	5.51	0.94	0.429	1.22	1.47	1.2	2.22	0.367	0.735	ND	ND	ND	ND	ND	1.53	0.767	3.07	1.92	ND	0.986	0.329	ND	1.85	0.555	1.29	3.14	ND	0.37
17411	ESAT-6 and CFP-10	56	ND	ND	ND	ND	1.47	1.32	1.1	0.438	0.639	0.898	0.515	0.963	0.444	0.426	0.687	0.613	0.639	0.993	1.3	4.64	0.389	0.662	0.687	0.788	0.944	3.07	1.08	4.55	ND	ND	ND	ND	ND	1.29	1.76	0.643	0.767	ND	0.668	0.767	ND	1.17	0.964	0.689	2.27	ND	0.895
17411	ESAT-6 and CFP-10	90	ND	ND	ND	ND	0.094	0	0.0377	0	0.094	0	0.0753	0	0.094	0	0.113	0.213	0.282	0.134	0.452	1.28	0.329	1.07	0.301	0.426	0.517	0.134	0.602	0	ND	ND	ND	ND	ND	1.66	3.42	1.89	0.855	ND	1.57	1.35	ND	1.2	7.21	2.88	2.88	ND	2.64
17411	ESAT-6 and CFP-10	120	ND	ND	ND	ND	0.377	0.583	0.499	0.223	1.74	2.85	0.384	0.891	0.881	1.75	0.307	1.56	0.881	1.17	0.999	2.9	0.78	1.36	0.307	1.11	1.06	3.11	1.08	5.12	ND	ND	ND	ND	ND	0.522	1.21	0.75	1.08	ND	0.587	0.522	ND	0.652	2.72	2.07	4.13	ND	1.52
17411	ESAT-6 and CFP-10	150	ND	ND	ND	ND	1.53	1.59	2.2	1.63	2.16	2.13	1.6	1.08	0.631	1.05	0.784	0.771	0.0971	0.216	1.61	24.8	0.874	1.33	0.902	0.771	1.1	1.26	2.71	24.1	ND	ND	ND	ND	ND	1.79	3.08	0.862	0	ND	1.19	1.07	ND	1.61	3.6	1.8	0	ND	1.7
21310	ESAT-6 and CFP-10	10	0	0	0	0	0.2145	2.292	3.255	0.64	3.22	8.31	3.92	0.241	0	0.306	8.62	2.81	0	0	6.43	29.4	12.5	1.99	3.56	3.79	0.644	0	4.59	4.33	12.5	1.53	4.43	1.33	0	6.25	8.42	0	0	0	37.5	0.777	0	1.32	2.63	0.407	0	0.407	26.4
21310	ESAT-6 and CFP-10	120	2.33	7.85	3.87	2.86	3.5	7.815	5.745	6.605	4.84	17.8	6.51	4.44	1.29	0.495	1.18	1.89	0.0896	0	6.01	2.41	30	39.6	2.24	3.74	0.986	2.94	11.9	11.6	4.73	17.4	5.68	10.7	1.72	0.0785	2.82	1.43	0	0	8.46	0	2.03	0.127	2.28	0.793	0	0.132	7.79
21310	ESAT-6 and CFP-10	150	ND	ND	ND	ND	0.156	0	2.07	1.36	ND	ND	ND	ND	0.0782	0	1.66	0.107	ND	ND	ND	ND	5.48	8.78	1.11	0.257	ND	ND	ND	ND	0.156	0.966	6.09	11.7	ND	0	ND	1.27	ND	0	5.49	ND	ND	0.072	ND	0	ND	0	1.3
21310	ESAT-6 and CFP-10	180	32.5	34.1	8.74	43.9	20.69	21.84	0.20215	4.2905	3.53	4.89	1.04	1.4	54.6	68.8	13.7	83.2	48.5	33.6	100	99.6	58.3	72.9	3.58	51.1	10.7	7.83	2.64	3.41	25.4	37.8	0.667	4.92	7.34	22.015	4.63	33.9	0	19.3	73.8	2.19	1.78	15.4075	1.61	63.5	0	20.1	66.2
21310	ESAT-6 and CFP-10	20	9.17	17.1	9.34	12.1	9.3665	8.5065	28.82	39.365	6.12	10.8	7.17	5.86	0.378	0	1.89	0.508	0.205	0	7.2	0.523	0.294	0.18	0.521	0.254	0	0.235	5.48	3.97	0.294	0.359	8.12	10.2	2.31	16	1.4	0.186	0	0	0	0.1	2.16	9.55	1.7	0.277	0	0.416	0.554
21310	ESAT-6 and CFP-10	30	2.15	8.04	17.9	1.83	0.108	0.41	0.1205	0	0.269	1.75	4.13	0.417	0	1.23	15.7	2.42	0	0	14.2	0	0.863	1.64	0.964	0.281	0	0	11.9	0.0834	0	0	2.17	0.0702	10.7	1.725	8.93	0.431	0	0	0.862	0	40.3	0.256	32.7	0.634	0.195	0.106	2.01
21310	ESAT-6 and CFP-10	42	7.83	11	3.28	2.79	1.155	2.165	0.05	0	6.04	9.23	1.59	2.23	1.04	4.04	1.77	1	3.5	0.0678	3.63	0	7.82	25.4	5.62	6	2.01	2.04	0.92	2.79	1.22	2.69	0.361	3	8.12	1.1675	5.09	4.28	0.485	0.875	4.28	0.848	7.77	2.4615	5.28	5.45	0	0.931	5.85
21310	ESAT-6 and CFP-10	56	1.09	11.9	1.15	5.62	5.8175	13.765	17.575	29.795	0.673	4.53	0.518	0.76	0.698	5.56	3.81	1.42	0.0841	0	1.55	0.152	1.46	18.3	2.7	3.55	0.168	2.74	5.06	6.38	0.952	22.9	4.29	3.91	0.633	12.6905	1.63	0.504	0.0905	0	0.378	0	1.23	16.192	2.27	0.265	0	0.529	0.529
21310	ESAT-6 and CFP-10	90	6.22	53.8	2.48	54.5	31.09	35.55	13.7	18.1	17.3	89.7	4.92	41.6	0.288	0.757	1.48	0.27	0.397	3.17	3.74	18.1	0.863	2.52	2.38	0.575	0.397	10.3	4.7	44.9	1.03	11.5	8.36	4.94	6.59	13.14	7.56	0.295	0	0.886	0.591	0	77.9	72.9	27.6	0.435	1.38	6.39	0.871
21410	ESAT-6 and CFP-10	10	5.74	1.95	6.71	5.64	0	1.3536	0	0	7.56	10.9	2.86	2.6	0.15	0	3.25	0.253	0.13	0	24.2	0.867	6.75	3.13	2.88	2.53	0	1.4	0	0	0	2.12	0	0	0.229	0.2295	1.38	2.5	0.459	0	10	0	0.487	2.725	1.56	0	0	0	14.8
21410	ESAT-6 and CFP-10	120	1.12	4.65	9.59	14.6	1.115	1.16025	4.07	6.76	1.12	6.07	7.9	10.3	0.69	0.424	1.42	3.64	0.0745	0.129	12.6	7.56	25.3	24.4	1.59	3.64	0.372	0.969	9.84	12.5	0.394	4.72	4.94	7.93	0.487	0.905	1.46	0.837	0	0	2.65	0	2.18	0.6	2.18	1.81	0	0	6.33
21410	ESAT-6 and CFP-10	150	14.3	33.8	6.77	7.99	70.1	64.85	57.55	59.55	6.44	16.1	1.61	2	44.7	49	2.67	84.1	0	0	23.3	37.9	0.189	0	0.594	0.107	22.5	18.6	96.3	97.5	59.3	45.1	2.93	99.9	4.79	51.845	9.28	47.2	0	57.7	0	31.1	4.22	46.9	9.64	43.8	0	22.7	0
21410	ESAT-6 and CFP-10	180	15.2	10.3	9.14	52.3	18.958	32.9	0.052	2.6935	1.95	1.54	0.381	1.83	68.5	78.2	7.84	75.4	91.2	21.6	100	100	78.3	89.8	11.3	67.6	10.4	7.62	7.18	2.75	13.2	23.8	0.762	1.68	9.22	18.425	3.3	40.1	1.2	8.26	88.8	0.9	4.72	43.25	2.83	75.1	0	9.24	86.3
21410	ESAT-6 and CFP-10	20	3.56	8.02	4.04	5.77	0.11275	1.4365	0.01175	0	1.42	2.72	1.83	2.01	0.124	0.135	7.98	2.85	5.37	0	7.16	0	0.62	1.89	1.35	2.63	0	0	0.0594	0.35	0	0.406	0.0582	0.228	3	2.522	7.5	0	1.91	0	0	0	7.34	17.365	10.2	0.211	0	2.11	0.634
21410	ESAT-6 and CFP-10	30	16.6	14.8	12.1	12.1	0.813	0.53	0.337	0.279	8.11	5.2	7.09	5.6	1.29	0.798	2.28	0.739	20	2.29	41	11.6	0.479	0.912	0.495	0.185	0	0.208	3.16	5.04	0	0.684	1.49	2.59	4.12	0.54	1.69	0	11.4	0	0	0	2.42	0.815	1.45	0	0	0	0.271
21410	ESAT-6 and CFP-10	42	4.69	4.44	8.44	7.2	1.477	2.17	0.2265	0	3.29	3.13	3.72	4.02	7.57	19.2	21.3	16.1	0.282	0	0.801	0	8.36	18.6	13.5	16.4	1.03	1.35	1.09	1.51	0.44	1.92	0.904	3.5	8.99	4.9	6.35	8.89	1.06	0.808	25.3	0.529	4.4	4.625	2.4	5.09	0.0801	1.15	20
21410	ESAT-6 and CFP-10	56	0.834	6.12	1.32	4.4	2.53	8.035	10.095	27.45	1.29	7.7	1.17	2	0.6	8.16	1.6	1.48	0.0758	0	14.1	4.8	4.35	23.1	4.09	17.3	0.228	0.504	8.38	9.6	0.235	7.45	4.06	18.4	0	2.4125	1.69	0.49	0	0	0.49	0.241	0	1.525	3.05	1.17	0	0.391	0
21410	ESAT-6 and CFP-10	90	0.331	0.893	1	1.68	5.59	6.483	0.06	0.28	1.04	1.66	1.56	1.12	0.154	0.492	4.25	1.96	0.456	0.0638	1.6	1.12	0.401	1.39	1.52	0.98	0.0829	0.0638	0.805	1.12	0.524	0.902	0.612	0	0.723	4.0265	2.17	0	0	0	0.222	0	1.54	5.69	1.69	0.373	0	0.995	0.746
21510	ESAT-6 and CFP-10	10	0.407	0.139	1.92	0.266	0.3925	2.6705	0.13635	0	3.36	0.47	1.73	0.222	2.63	0.968	2.55	0.286	0	0	81.9	51	7.53	3.53	2.58	0.857	0	0	0	0	0	0.656	0	0	0	0.1005	2.62	0.26	0	0	0.781	0	0	4.68	0.752	0	0	0	1.15
21510	ESAT-6 and CFP-10	120	77.6	44.3	3.58	9.67	39.65	40.4	2.375	3.97	64.1	30.3	4.48	9.21	0	0	0	0	5.36	12.8	4.46	3.8	0	0	0	0	7.29	8.23	0.316	1.27	0	0	0	0	74.2	31.2	30.1	0	6.69	0	0	3.85	63.5	32.95	8.83	0	7.52	0	0
21510	ESAT-6 and CFP-10	150	7.41	11.2	4.73	6.96	41.54	46.215	4.69	43.565	10.3	15	6.6	6.96	28.2	35.7	5.22	33.6	0	0.268	4.39	3.65	0.0486	0.818	0.212	0.243	0.294	0.179	1.66	2.09	27.5	20.5	2.71	13.6	8.22	34.815	15.2	24.9	0	26.2	0.172	0.992	16.1	37.42	29.2	30.6	0	10.1	0.349
21510	ESAT-6 and CFP-10	180	8.09	17.9	6.17	25.7	14.7415	31.08	0.1573	18.865	0.871	5.7	1.09	0.178	37.6	56.3	5.41	49.2	0.225	0.439	11.9	83.3	25.4	51.1	0.571	37.8	3.2	4.44	3.43	1.43	13.8	23.1	0.328	0	2.18	13.3251	0.126	8.74	49.8	8.58	53.4	0.0251	5.12	17.2915	0.583	51.4	32.1	12.3	55.4
21510	ESAT-6 and CFP-10	20	0.795	2.44	1.65	3.33	7.889	5.65	18.44	19.87	0.548	2.99	1.54	4.99	0.0759	0.579	1.08	1.71	0	0	1.9	0.52	0.126	0.29	0.6	1.19	1.67	1.47	8.23	9.56	1.06	0.811	7.49	11.1	1.74	27.4794	1.86	0.204	0.0295	0.327	0.143	0.177	8.96	20.2	9.98	1.19	0	0.349	1.75
21510	ESAT-6 and CFP-10	30	4.94	4.63	4.74	4.7	1.3355	0.0458	4.04	0.04925	7.58	6.41	6.48	6.52	1.25	0.62	1.12	2.3	0.199	0.137	1.94	2.1	2.84	3.24	2.09	7.2	5.43	4.54	13	18.5	2.71	2.29	11.7	19.5	0.77	1.131	1.94	0.512	0	0	0.0512	0.596	5.19	0.0665	12.3	1.73	0.0468	0	0.931
21510	ESAT-6 and CFP-10	42	0.744	2.37	1.51	3.12	1.805	2.18	5.595	7.485	4.08	9.75	5.47	10.4	0.727	9.31	2.55	11.3	0.425	0.254	10.3	14.3	0.753	4.05	1.96	8.23	2.3	2.72	6.58	9.5	4.36	11.5	10.4	29.6	3.44	0.615	1.79	2.6	0	0.0578	3.21	0.256	3.54	0.8395	1.95	8.81	0	1.56	8.07
21510	ESAT-6 and CFP-10	56	0	0	0.0356	0.195	0.4415	0.405	0.885	0.153	2.91	2.79	1.85	2.73	0.153	2.38	0.387	2.08	0	0	3.63	22.8	2.93	7.88	1.65	5.02	1.31	1.4	2.96	5.71	3.64	18.6	6.3	12.4	0	1.925	0.4	0	0	0.128	0	0.2	0	1.85	0.826	0	0	3.7	0.926
21510	ESAT-6 and CFP-10	90	0.46	0.508	0.516	1.48	22.75	19.7	12.925	27.6	0.422	0.677	0.492	0.554	0.184	0.136	0.474	1.18	0.0384	0	0.949	2.21	0.319	0.409	0.342	0.888	0.0192	0.113	1.42	2.77	0.721	5.46	2.03	4.44	0.622	0.5655	0.747	0.194	0.0933	0.0834	0.556	0.124	0.692	5.455	0.461	0.127	0.115	1.4	0.762
21610	ESAT-6 and CFP-10	10	6.6	0	2.65	0	1.788	5.67	0	0	6.6	1.33	3.01	5.81	10.4	3.12	9.49	0	6.13	0	95.2	69.8	11.2	4.51	4.86	1.72	4.25	0	0	0	0	0	0	0	1.28	7.3205	0.641	0.541	0.641	0	0.541	0.641	0	57.9	0.596	0	0	0	0
21610	ESAT-6 and CFP-10	120	79.4	49.2	4.91	6.61	37.4222	36.795	4.605	6.5005	59.1	32.4	5.94	5.29	1.69	1.27	3.1	7.41	7.12	21	3.84	1.04	34.6	33.9	2.61	7.08	8.66	14.6	2.34	2.83	0.311	4.86	4.9	9.08	82.5	27.5325	35.6	1.76	6.54	0.122	3.34	3.66	69.3	27.55	11.6	6.11	10.3	0.417	6.81
21610	ESAT-6 and CFP-10	150	2.17	7.6	2.79	4.08	41.5485	45.7	2.455	39.66	5.59	12	4.82	4.39	35.3	42.9	2.35	39.9	0	0	3.31	2.82	0.301	1.57	0.951	0	0.132	0	3.51	5.64	28.9	16.1	7.44	17.9	3.57	36.68	8.02	31.4	0	30.1	0.666	0.594	3.64	36.215	8.91	51.6	0	18	5.07
21610	ESAT-6 and CFP-10	180	18	33.5	7.48	48.7	18.645	33.625	0.3645	18.23	6.83	9.57	1.71	0.84	35.4	73.6	5.75	62.8	1.05	0.29	43.3	96.6	20.2	64	4.98	44.3	10.9	14.7	8.88	2.94	15.2	29.8	3.35	1.23	4.68	14.649	1.49	7.77	15.1	12.5	47.9	1.39	9.95	22.1	1.72	58.7	16.3	14.8	57.7
21610	ESAT-6 and CFP-10	20	0.51	2.26	1.72	2.85	27.35	19.15	53.8	71.45	0.17	0.532	1.02	1.42	1.55	1.8	2.39	2.66	0	0	1.32	0	2.71	3.86	4	8.34	0.0851	0	7.42	12.8	0.121	0.601	11.4	14.6	0.0437	53.2	1.05	0.0528	0	0	0.211	0	0.862	47.3	1.44	0	0	0	0
21610	ESAT-6 and CFP-10	30	1.86	0.989	1.87	0.981	6.8	3.68	0.585	0	0.641	0.33	1.1	0.516	1.75	1.29	1.37	2.76	0.0582	0	8.73	10.2	1.55	0.647	0.94	2.76	0.175	0	3.45	6.4	0	0	2.59	5.91	0.249	5.425	0.873	0.126	0	0	0.253	0	0.885	4.035	0.885	0	0	0	0.472
21610	ESAT-6 and CFP-10	42	4.6	15.3	3.83	4.07	5.585	9.245	14.9	15.1	3.37	9.52	1.79	0.815	0.628	2.52	0.975	0.675	0	0	4.51	1.22	3.14	17.9	3.74	4.38	0.368	0.612	4.76	4.28	0.579	5.04	4.82	7.08	3.76	36.673	1.17	3.28	0	0.082	2.46	0.117	3.59	38.6905	1.31	10.8	0	0.563	10.4
21610	ESAT-6 and CFP-10	56	0.779	4.38	1.79	14.5	1.97	2.785	12.135	19.25	1.27	3.62	1.52	6.76	1.24	11	4.23	2.5	0.0708	0	5.74	2.42	1.3	8.1	2.05	3.5	0.354	0.19	5.47	6.28	0	9.94	6.52	18.5	1.14	13.168	2.05	0	0	0.543	0.136	0.228	5.67	12.135	10.1	0.781	0	3.52	1.17
21610	ESAT-6 and CFP-10	90	2.29	1.58	1.79	2.01	4.195	10.865	4.405	38.1	0.31	0.591	0.447	0.208	1.26	0.627	1.35	0.355	7.92	0	17.3	0.0693	1.19	1.25	1.64	1.42	0	0	2.42	9.56	0.557	3.89	4.09	4.26	0.444	3.1865	1.63	0.344	2.07	0	0.413	0	0.19	6.0405	0.381	0.51	0	1.63	0.918
21710	ESAT-6 and CFP-10	10	1.37	1.03	5.54	0	1.98	4.4215	0	0.242	4.6	2.43	5.27	1.56	1.15	0.0483	0.0605	0.0578	3.98	0	92.5	54.9	9.68	1.91	6.72	3.53	0	0.0607	0.137	0	0.23	0.942	0	0.174	1.83	15.85	1.52	0.221	0.152	0.221	1.1	0	0	70.65	1.22	0.0501	0	0	0.902
21710	ESAT-6 and CFP-10	120	76.2	46	5.69	16.4	32.13	37.715	6.25	11.04	45.7	20.8	8.01	19.7	1.02	2.45	2.12	20	4.27	11.9	3.81	4.26	4.66	11.3	2.76	3.99	7.34	9.26	2.2	4.1	0.23	4.9	1.42	5.54	78	26.655	23.3	1.12	4.23	0	1.05	3.74	62	26.055	7.17	5.34	5.53	0.46	5.43
21710	ESAT-6 and CFP-10	150	1.08	7.02	2.1	8.6	40.47	44.265	5.025	42.29	4.14	13.8	4.14	9.68	29.7	35.8	4.21	59.3	0.0493	0	4.81	2.69	0.241	0.829	0.866	3.8	0.148	0	2.04	1.08	24.4	22.6	4.51	16.3	4.65	38.185	5.91	31.8	0	26	0.863	0.473	7.01	37.98	9.73	38.8	0	12.7	0.919
21710	ESAT-6 and CFP-10	180	3.07	9.4	2.51	20.6	18.988	31.405	0.1195	16.865	0.249	0.716	0.276	0	28.1	45.5	3.6	55.2	18.7	18.3	98.5	87.1	15	39	1.58	42.7	2.53	5.44	4.33	2.19	16.4	30.5	1.03	1.37	1.49	15.86	1.02	4.47	0.0579	16.6	58.2	0.522	5.56	34.65	0.856	47.3	0	17.6	54.8
21710	ESAT-6 and CFP-10	20	0.3	1.77	2.29	12.6	0.152	0.242	7.775	4.655	2.31	3.96	5.61	9.68	0.968	1.1	1.99	3.89	0	0	2.71	0.88	0.199	1.1	0.941	2.22	2.19	3.13	15.9	14.4	0.911	1.65	7.69	6.67	0.294	17.7835	0.587	0.292	0	0.125	1.46	0.392	1.78	11.05	2.67	0.603	0	0.452	3.02
21710	ESAT-6 and CFP-10	30	3.36	3.57	10.5	3.39	0.9365	0.513	0.8525	0.6505	1.15	1.3	6.06	1.36	0.766	0.917	3.44	1.72	8.19	0.206	30	5.96	1.72	3.25	3.62	3.95	0	0.0686	1.57	0.949	0.0383	0.584	3.04	5.49	2.13	1.109	1.46	0.867	2.69	0	0.217	0	3.51	0.7	2.14	2.23	0	0.318	0.318
21710	ESAT-6 and CFP-10	42	4.72	7.6	7.83	13.9	1.8935	2.32	9.515	13.775	3.48	6.02	4.17	7	0.949	7.9	2.4	6.72	0.262	0.303	13.3	10.4	0.733	4.39	1.26	4.34	0.898	1.48	4.51	8.54	0.431	7.43	4.93	16.7	3.1	0.942	6.1	1.64	0.0968	0.468	2.28	0.774	2.84	0.197	4.75	2.9	0.0258	1.23	2.63
21710	ESAT-6 and CFP-10	56	0.904	5.8	1.88	15.2	0.9615	2.73	3.6695	4.415	0.771	4.07	1.17	6.96	0.187	2.31	2.81	6.59	0.0266	0.138	3.8	2.53	0.294	3.94	1.98	4.58	0.16	0.967	2.59	5.7	0.267	5.46	8.95	29.8	0.724	1.328	0.517	0.0462	0	0.37	0.0924	0.103	2.57	0.7635	1.68	0.131	0	1.53	0.0437
21710	ESAT-6 and CFP-10	90	0.85	5.81	0.72	1.1	16.75	10.0245	6.515	25.535	0.637	2.43	0.549	0.737	0.19	0.648	1.76	1.08	0.091	0.628	1.99	1.1	0.68	2.75	1.27	2.94	0.121	0.863	3.2	5.71	1.14	4	4.82	2.16	0.802	0.801	0.535	0.187	0.0891	0.0375	0.637	0.0891	1.35	0.416	0.613	0.186	0.123	0.557	0.278
21810	ESAT-6 and CFP-10	10	0.412	6.8	1.37	13.3	5.61	2.97	30.9	21.8	0.206	3.2	1.63	8.13	0.139	2.59	2.57	2.94	0.206	1.09	19.9	16	0.976	18.7	0.834	17.1	6.45	8.3	18.2	22.6	0.279	8.87	9.3	16.8	1.19	9.405	0.584	1.62	8.75	5.21	1.3	0.271	5.4	5.31	3.35	3.3	4.19	5.78	3.8
21810	ESAT-6 and CFP-10	120	96.8	68.9	3.63	6.74	50.625	55.45	1.15	7.375	77	17.4	1.51	1.25	41.2	20.3	1.43	54.8	46.1	50.2	5.76	6.43	97.1	91.5	2.02	58.7	47.3	47.4	7.23	7.37	27.1	45.5	2.72	36.6	97.3	48.45	46.3	85.7	49.6	52.6	87.4	46.2	92.5	49.8077	3.27	0.0463	44	2.53	17
21810	ESAT-6 and CFP-10	150	5.58	8.08	1.73	1.1	27.955	14.1515	0.2755	1.965	2.77	6.89	0.23	0.116	56.5	26.6	5.96	21.2	16.8	15.1	93	79	64.5	44	11.1	26.8	0.657	0.428	0.761	0.463	24.7	13.2	4.04	2.2	2.45	8.84075	1.59	23.2	40.4	19.2	26.1	0.0815	1.21	7.0915	0.283	19.8	24	3.58	29.7
21810	ESAT-6 and CFP-10	180	4.87	4.8	2.31	0.853	1.1445	4.22	0.1508	3.773	17	15.6	16.5	0.213	1.44	1.32	2.07	3.91	1.35	0.981	8.54	1.07	2.51	4.28	1.88	3.09	0.676	0.436	5.28	2.13	5.03	11.4	3.72	3.78	0.173	0.855	0.382	0.0714	0.59	7.5	2.5	0.139	0.241	4.5495	0.241	0.909	0.241	8.38	1.31
21810	ESAT-6 and CFP-10	20	4.47	17.7	6.37	31.8	5.91	5.45	1.4025	11.11	4.47	21.6	6.13	35.1	0.876	13.9	2.31	16.2	0.112	0.103	9.66	0.166	0.657	4.64	2.48	12.4	1.79	2.99	12.1	31.8	0.219	3.62	7.29	16.8	4.99	1.6815	3.2	0.29	0	0	0.58	0	8.95	0.492	6.06	0.591	0.0962	0.295	1.28
21810	ESAT-6 and CFP-10	30	6.56	11.4	5.41	5.22	0.3745	3.485	3.985	8.665	2.57	7.72	1.52	3.89	1.23	4.84	1.22	4.56	0.0694	0.0505	7.27	1.7	2.76	11.2	1.82	8.71	2.32	1.97	12	9.72	0.263	5.76	3.18	5.39	0.958	0.1735	1.42	0.189	0.414	0	0.545	0.155	2.4	0.262	6.94	0.132	0.0381	0.307	1.4
21810	ESAT-6 and CFP-10	42	1.95	6.21	3.47	3.12	0.344	1.7645	4.52	1.375	6.81	12	8.01	9.38	0.941	6.02	3.16	4.29	0.338	0.74	8.51	11.2	2.03	9.66	2.47	4.72	1.4	3.08	15	2.5	0.724	15.4	10.9	10.1	1.89	0.8445	0.767	1.28	0.118	0.543	3.11	0.118	2.34	0.4635	0.982	4.09	0.237	6.45	8.92
21810	ESAT-6 and CFP-10	56	2.14	18.4	1.47	3.99	1.1105	2.7	2.485	6.18	1.71	12.2	0.913	2.12	0.38	5.38	0.257	0.594	0.244	0.399	4.07	1.62	0.634	9.07	0.337	2.97	0.407	2.65	3.38	2.49	0.338	7.9	2.1	4.26	1.39	0.557	2.34	0.113	0.486	1.42	0.203	0	4.09	0.1025	5.27	0.552	0.205	1.17	0.982
21810	ESAT-6 and CFP-10	90	ND	ND	ND	ND	11.15	8.2	1.53	3.29	ND	ND	ND	ND	0.458	1.42	0.513	0.135	ND	ND	ND	ND	0.0982	2.37	1.62	0.203	ND	ND	ND	ND	0.851	2.37	1.64	1.22	ND	0.06	ND	0.405	ND	0	0.48	ND	ND	0.2535	ND	0.507	ND	0.254	1.84
21910	ESAT-6 and CFP-10	10	0.299	10.6	0.598	3.12	4.51	7.25	12.25	18.65	0.171	1.22	0.462	2.81	0.0894	4.32	1.26	1.43	0.256	2	16.7	13.7	0.939	16.7	0.446	2.34	1.19	2.56	8.83	9.52	0.716	18	3.85	17.4	0.672	2.2855	0.261	1.36	0.0373	3.57	1.36	0.112	2.74	1.3865	1.48	0.976	0.0703	3.78	1.16
21910	ESAT-6 and CFP-10	120	99.2	96.3	7.43	11.8	50.895	57.4	4.1865	15.55	97.7	77.7	4.15	2.52	41.9	30	2.07	60.5	58.5	64.5	21.6	15.1	97.5	95.1	1.07	72.8	48.5	52.9	7.63	7.56	24.3	45.7	3.34	45.4	99.8	49	94.3	92.3	59	54	94.3	49.6	95.6	46.75	40	0.221	57.7	3.44	33.7
21910	ESAT-6 and CFP-10	150	1.97	3.05	1.2	1.02	4.891	4.4955	0.4405	0	0.084	1.85	0.2	0.171	27.1	19.4	8.56	14.2	35.3	28.9	98.6	99.1	25.4	25.3	0.801	15.7	0.126	0.482	0.6	1.02	17	9.63	2.22	2.46	2.64	0.5915	3.12	20.4	79.1	12.6	28.4	0	1.2	1.0356	0.784	24.4	49.7	3.9	24.9
21910	ESAT-6 and CFP-10	180	3.14	7.06	2.24	5.81	0.846	10.175	0.1815	0	4.8	8.07	4.76	0.415	4.55	1.24	1.59	11.3	1.82	0.631	8.51	3.32	7.18	4.66	2.18	11.9	0.248	0.504	6.38	2.9	9.82	11.8	11.2	9.79	0	0.201	0.957	0.67	1.38	23.7	6.03	0	0.0709	1.1795	0.355	5.93	0.567	30.3	6.15
21910	ESAT-6 and CFP-10	20	4.93	3.64	8.75	8.04	1.11	2.34	2.92	4.595	8.99	5.96	12.8	3.75	0.597	0.756	2.05	1.1	17.7	0	42.9	0	0.896	0.504	1.2	0.734	0.58	0.993	5.83	33.8	3.14	3.53	11.5	16.9	10.4	24.05	23	37.1	16.2	35.7	37.2	10.7	7.23	0.527	26.8	0.471	0	3.61	1.41
21910	ESAT-6 and CFP-10	30	4.61	11.6	2.58	6.46	0.3085	5.995	1.315	5.41	2.34	5.59	1.17	3.63	0.945	7.67	0.901	4.04	0	0.164	4.66	2.69	2.36	16.9	1.28	7.32	4.61	6.5	15.7	15.5	0.21	8.01	2.41	5.3	1.99	0.0805	1.03	0.348	0	0	0.218	0	5.36	0.0975	4.97	0.0488	0.0765	0.146	0.976
21910	ESAT-6 and CFP-10	42	1.23	2.69	4.04	5.59	0.803	1.1145	5.36	1.43	4.29	5.46	5.77	13.4	1.2	4.25	2.64	2.95	0.153	0.299	5.88	1.4	5.75	10.1	6.27	7.08	0.46	0.973	10.8	2.23	0.343	2.81	7.64	2.95	5.15	1.073	2.94	1.45	0	0.229	1.53	0	3.22	0.0457	0.908	2.47	0	1.01	2.93
21910	ESAT-6 and CFP-10	56	0.366	10.2	0.812	0.838	0.941	4.09	1.97	4.87	3.9	14.1	2.65	3.63	1.52	19.6	1.39	3.89	0.122	0.589	6.36	3.63	3.34	22.7	2.14	7.06	0	1.47	2.86	3.07	0.304	5.26	1.26	1.46	0.312	1.0525	1.56	1.46	6.98	1.01	4.95	0	7.39	0.3535	10.4	14.2	9.03	0.997	18.8
21910	ESAT-6 and CFP-10	90	0.633	6.59	1.72	0.324	10.575	11.83	2.275	11.434	2.63	0.329	2.43	0.811	0.307	1.54	1.05	0.154	4.49	10.9	8.43	8.11	0.102	5.77	1.33	0.0772	1.14	2.14	3.25	0.973	1.23	4.1	2.02	0.694	0.627	0.2445	0.209	0.169	3.95	0.0241	0.457	3.11	0.836	3.7685	0.396	0.187	8.75	0	1.21
22010	ESAT-6 and CFP-10	10	1.16	16	4.41	15.5	0.0454	0.68	1.475	0	0.473	5.31	2.01	2.97	0.363	1.87	3.5	2.57	0	0	5.7	0	0.0454	0	1.56	0.183	0.043	0.474	5.85	2.5	0.0908	0.255	5.2	2.2	0.832	0.565	0.277	1.01	0.139	0.378	0.378	0	1.5	0.329	0.214	0.329	0	0.329	0.329
22010	ESAT-6 and CFP-10	120	24.4	20.3	1.89	3.15	6.1317	11.1925	3.18	5.6	4.83	1.11	1.47	0.64	0.0634	0	2.59	0	6.39	15.5	10.9	6.67	1.65	17.1	1.45	0.417	5.93	12.5	1.51	3.47	0.19	6.8	2.17	7.51	45.6	4.8625	12.5	2.09	5.94	0.19	2.57	4.53	25.8	4.285	0.897	1.63	6.28	0.0776	2.95
22010	ESAT-6 and CFP-10	150	3.69	5.63	4.8	12.8	31.755	42.995	5.535	46.7	5.24	5.85	2.66	2.24	16	28	8.37	30	0	0	6.76	0.319	7.12	26.9	8.71	28.6	0.0709	0	2.1	0.958	24	15	10.1	14	8.45	31.695	2.68	48	0	25.3	11.2	0.141	4.52	31.83	1.36	29.5	0	7.08	14.2
22010	ESAT-6 and CFP-10	180	1.81	1.84	1.04	5.18	0.423	1.845	0.0192	0.1015	0.389	1.22	0.696	0	17.8	21.4	3.51	39.8	0.13	0	2.04	3.63	48.1	32.5	1.17	39.5	0	0	1.39	27.1	15.5	24.3	7.87	17.7	1.44	0.155	3.12	2.17	0.48	18.9	50.2	0	0.426	4.4995	0.426	18.6	0	20.9	36.4
22010	ESAT-6 and CFP-10	20	0.168	2.44	0.505	1.31	0.317	0.3095	2.435	0	0.112	0.264	0.138	0	0.23	0.731	1.54	0.603	8.73	4.35	99	97.9	0.288	0.731	0.208	0.503	0.28	1.32	0.528	0.197	0.461	3.41	0.26	0.503	1.35	10.54	0.45	0.823	4.28	0	0.412	0.225	3.08	3.28	0.467	0.25	0.935	0.25	0.375
22010	ESAT-6 and CFP-10	30	2.9	9.33	3.83	10.3	3.91	1.758	21.64	24.275	1.59	5.54	1.65	3.09	0.601	2.13	1.33	1.15	0	0.0372	6.49	4.93	1.2	4.4	2.94	4.05	2.21	2.86	16.2	18	0.45	0.426	8.22	7.72	1.53	1.973	3.99	6.12	0	0.266	4.79	0.307	1.21	2.9435	1.59	3.63	0	0.726	3.39
22010	ESAT-6 and CFP-10	42	3.23	12.8	4.35	3.35	4.83	14.115	17.05	41.15	2.85	9.18	4.46	1.44	0.735	3.68	2.55	4.58	0.517	0.556	15.7	10	1.23	8	1.91	3.43	1.94	2.64	8.36	9.81	2.16	16.5	8.79	15.8	1.79	5.98	2.98	0.837	0	0.139	1.53	1.04	1.93	14.3	4.05	0.983	0	1.23	3.56
22010	ESAT-6 and CFP-10	56	3.71	10	3.07	4.61	0.2812	1.905	4.93	12.38	6.54	16.4	5.86	7.51	0.298	1.95	0.954	0.722	0.391	0.797	10.2	5.03	0.893	6.15	2.13	1.96	0.781	4.78	5.81	8.03	0.446	0.585	9.24	13.1	2.1	1.34	2.38	0.617	0	0	0.617	0.42	3.35	3.635	3.35	0	0	0	0.466
22010	ESAT-6 and CFP-10	90	0.572	0.825	4.26	0.16	0.862	0.4645	4.025	9.475	0.748	0.619	2.79	0.16	0.672	0	0.782	0.344	0.044	0	6.01	1.76	0.537	0.372	0.966	0.344	0.308	0.206	6.52	6.41	2.42	1.12	8.74	4.64	2.04	0.4635	0.544	1.53	0.136	0.437	1.86	0.136	1.2	0.332	0.797	0.251	0.531	0.251	0.377
22210	ESAT-6 and CFP-10	10	0.141	7.57	2.41	6.89	0.02455	0.2385	2.01	0.0565	0.281	3.22	1.49	2.7	0.0982	1.35	2.32	2.71	0	0	2.52	0.082	0	0	2.04	0	0.0468	1.19	6.15	7.46	0.0491	0.397	3.8	2.37	0.106	0.0481	0.213	0	0	0	0.192	0.638	0	0.13	1.12	0.26	0	0	0
22210	ESAT-6 and CFP-10	120	33.8	20.2	2.44	1.27	2.885	9.838	2.41	1.17625	5.71	1.13	2.5	0.754	0	0.576	1.6	0.158	5.15	9.01	8.71	3.45	0.583	7.68	1.59	1.1	5.38	8.11	1.4	1.71	0.117	5.18	1.83	6.04	45.9	2.1055	7.28	1.51	4.74	0	1.21	2.71	35.6	1.58	0.949	1.69	3.01	0	2.95
22210	ESAT-6 and CFP-10	150	4.02	9.55	0.777	1.17	63.85	49.359	97.5	49.41	0.335	1.37	0.0996	0.1	28.6	50.9	32.9	38.9	57.9	0	91.3	59.6	0.182	7.45	0.12	0.393	22.7	0.0687	77.7	81	84.9	62.5	99.1	98.8	1.05	74.55	0	63.7	49.2	79.6	0.376	40.8	1.32	54.605	0	31.7	0	28.3	0
22210	ESAT-6 and CFP-10	180	4.32	4.79	2.11	2.4	0.4935	3.04	0.0825	0.109	2.81	3.63	1.57	1.89	36.3	32.4	4.35	54.3	0	0.145	2.41	0.437	65	1.65	2.39	60.4	0	0	1.41	0.728	15.6	23.3	2.93	24.1	3.07	1.5685	4.95	5.7	0	15.2	70.9	0	0.621	8.475	2.48	32.4	0	19.1	54.6
22210	ESAT-6 and CFP-10	20	0.196	0.472	0.872	0.629	16.25	3.025	25.75	8.48	0.0652	0.661	0.654	0.27	1.36	2.52	4.64	1.78	0.717	0.0944	65.6	78.3	0.509	1.68	1.28	1.33	0.261	0.283	1.09	0.18	0.226	1.16	0.197	0.889	0	4.395	0.439	0.586	0	0	0.391	0.146	0.517	0.329	0.904	0.921	0	0.132	0.526
22210	ESAT-6 and CFP-10	30	4.33	12.1	6.79	5.52	5.455	3.22	11.915	9.535	1.69	5.69	3.39	0.92	0.543	1.27	12.9	3.62	0.0528	0.322	14.8	8.59	2.38	3.54	15.3	7.97	2.91	3.92	22.4	21.2	0	0	4.02	1.45	3.31	2.07	3.46	1.73	0	0	2.77	0	3.42	0.993	2.93	1.14	0	0	1.6
22210	ESAT-6 and CFP-10	42	2.59	4.45	1.18	3.93	1.3475	1.753	0.53	0.3665	6.72	7.59	3.53	6.08	0.613	1.65	1.59	1.92	0	0.393	0.588	6.21	1.02	0.941	0.529	1.31	1.21	0.785	2.35	2.74	0.92	2.35	0.529	2.58	2.27	3.673	4.55	0.526	0	0	1.05	0	3.64	2.4205	7.07	2.11	0	0.452	4.07
22210	ESAT-6 and CFP-10	56	0	0.442	31.7	4.95	3.2955	0.91	27.65	0.33	0	0.442	32.7	4.62	1.37	13.3	55.9	2.3	0	0	40	1.32	0.341	14.9	20.6	1.72	0	0.221	26.8	0.66	0	0.545	5.88	4.6	0	0	2.11	1.04	0	0	1.04	0	2.53	0.3165	5.7	1.08	0	0	0
22210	ESAT-6 and CFP-10	90	8.55	1.85	3.25	0.5	0.224	0	0.2565	4.555	5.54	0.617	1.63	0	3.63	0	4.75	0	80.6	0	76.9	5.5	0.725	1.42	1.37	0	0	0	2.46	4	0.207	0.474	1.05	2.17	18.4	3.085	11.5	9.5	61.2	0	6.28	6	2.78	0	2.78	0.529	0.463	0	2.65
22310	ESAT-6 and CFP-10	10	1.03	5.12	2.32	15.7	0.0715	0.89	0.5465	0	1.08	6.14	2.34	13.3	1.1	15.8	3.72	13.9	0.197	0.512	5.81	3.01	0.621	0.355	0.507	0.464	1.08	1.02	6.87	7.61	1.77	4.74	9.82	11.3	0.59	0.091	0.337	0.456	0	0.0912	0.274	0	0	0.167	0	0.669	0	0	0.334
22310	ESAT-6 and CFP-10	20	2.83	6.86	2.56	7.17	0.50405	0.2495	0.8835	0.1455	0	0.149	0.0957	0.448	3.52	7.99	3.63	6.25	0	0	2.33	1.01	0.977	12.1	1.25	6.43	3.56	3.43	0.919	1.79	0.977	9.15	0.294	6.43	0.575	0.03595	0.503	0.5	0	4	1.75	0	5.12	0	1.66	0.378	0	4.16	1.51
22310	ESAT-6 and CFP-10	30	0	0	0	0	0	0	0	0	0	0	0	0	0	0	0	0	0	0	0	0	0	0	0	0	0	0	0	0	0	0	0	0	0	0	0	0	0	0	0	0	0	0	0	0	0	0	0
22310	ESAT-6 and CFP-10	42	2.59	7.01	3.57	9.5	1.075	2.39	4.82	11.08	2.52	6.46	3.48	5.88	2.34	11.5	1.45	4.98	0.0631	0.185	5.13	3.62	5.89	13.5	3.26	9.61	1.32	2.58	3.74	4.75	0.541	1.04	1.23	1.07	3.4	0.2135	2.65	2.38	0	1.29	2.87	0.519	5.34	0.849	3.89	3.57	0.139	0.595	6.55
22310	ESAT-6 and CFP-10	56	1.19	2.79	1.63	1.66	0.603	1.7195	0.316	8.155	3.03	6.05	3.23	3.64	0.539	4	0.652	0.294	0	0.116	3.81	1.03	0.959	5.09	1.44	1.76	0.0918	1.4	2.8	3.48	0.3	0.182	5.26	4.12	0.736	0.2544	2.21	2.3	0	0	2.22	0.164	1.62	0.3595	4.16	3.36	0	0	4.08
22310	ESAT-6 and CFP-10	90	0.987	0.735	4.29	2.29	2.32	2.415	3.8	11.185	1.15	1.47	4.35	1.71	3.45	5.86	6.47	5.08	0	0	5.11	2.86	2.07	4.83	4.06	11	0.164	0	6.43	4.57	2.86	2.07	8.59	1.69	1.31	0.0545	0.979	0.5	0	0.167	1.17	0	0	0.1025	0.637	1.02	0	0.205	1.23
22410	ESAT-6 and CFP-10	10	0.223	2.26	1.91	6.78	0	0.591	23.05	0.089	0.148	1.05	1.03	5.24	0.955	9.06	7.25	15.5	0.148	0.404	7.39	2.62	0.0955	0.0484	2.44	0	0.52	1.05	4.61	2.47	1.05	3.87	11.4	6.95	0.647	0.1295	2.59	3.89	0.431	0.518	0	0.862	0.818	0.451	1.06	2.34	0.0818	0.287	0.082
22410	ESAT-6 and CFP-10	120	5.3	23.2	3.38	8.97	0.585	4.065	1.47	13.235	2.7	8.91	4.18	4.04	0.243	0.977	1.08	1.85	0	0	9.18	1.97	0.121	5.94	1.29	26.3	0.0884	0	3.6	1.08	0	2.12	1.91	14.1	1.6	0.4085	4.64	0.823	0.15	0	0.206	0.0499	4.63	0.0272	3.88	0.653	0	0	0.163
22410	ESAT-6 and CFP-10	150	1.86	4.95	8.89	3.8	1.7	2.79	2.378	10.27	0.465	0.618	0.842	0.576	4.59	7.71	6.51	6.67	0	0	4.79	1.04	1.17	4	1.7	11.3	0.465	0.707	9.33	2.65	0.102	0.0727	8.86	2.61	2.58	1.0675	0.181	1.44	0	0	0.222	0.109	1.44	0.385	0.196	0.561	0	0.0623	0.125
22410	ESAT-6 and CFP-10	180	5.77	4.2	2.3	2.18	3.87	25.9	6.4	0.778	16.2	16.1	8.86	4.71	4.72	5.45	6.03	6.27	2.23	0.559	5.23	1.34	3.87	6.42	2.68	4.89	0.559	0.28	6.73	4.54	0	0	2.23	1.83	1.88	1.93	1.44	0.378	0.111	0	3.4	0	1.76	19.85	0.415	0	0	0	2.97
22410	ESAT-6 and CFP-10	20	0.167	11.1	1.57	14.2	5.98	6.09	0.08155	5.265	1.34	24.4	11.5	14.7	1.11	6.44	7.02	4.07	0	0	4.51	1.17	0.808	22.9	6.04	13	0	0.748	0.353	3.86	0.202	7.05	0.408	7.47	0.285	28.5	1.28	0.548	0	1.46	1.46	4.99	1.23	10.17	1.16	0.498	0	4.32	2.99
22410	ESAT-6 and CFP-10	30	1.68	8.46	4.99	11.3	1.5735	6.345	7.84	12.13	0.3	0.881	1.44	1.74	0	1.34	3.7	1.59	0	0.118	6.77	1.01	0	2.8	1.71	2.9	0.18	0.823	9.65	8.52	0	5.4	5.37	16.1	1.74	0.5565	1.33	1.26	0	1.75	2.13	0.153	1.7	1.171	0.89	0.884	0	4.9	3.95
22410	ESAT-6 and CFP-10	42	3.6	3.6	6.21	4.28	5.8	9.645	9.275	25.75	3.84	4.44	6.47	3.4	0.757	1.27	2.73	2.06	0.914	0.6	11.2	4.99	0.908	3.39	3.81	3.14	0.731	0.719	4.12	3.56	1.36	4.51	7.28	10.3	4.62	2.84	3.67	1.48	0.0633	0.0549	1.37	0.253	2.33	4.238	2.06	1.07	0.0541	0.459	2.3
22410	ESAT-6 and CFP-10	56	2.81	3.4	3.67	0.794	6.12	10.055	16.6	20.45	5.12	6.2	4.29	3.17	2.57	9.69	4.92	5.69	0.0826	0	4.64	1.98	3.12	10.6	4.33	5.28	1.73	1.77	6.21	4.76	3.24	3.81	14.8	13	4.49	0.9115	3.18	1.35	0	0.18	3.33	0.408	3.76	0.539	3.32	4.69	0	0	6.32
22410	ESAT-6 and CFP-10	90	4.73	7.33	21.7	6.09	0.233	0	13	0.8715	11.7	11.6	26.5	5.39	0.233	0.182	3.87	0.691	0	0.236	10.1	3.83	2.56	3.83	12.8	2.42	0	0	2.07	3.13	0	0	0.304	0	12.3	0.5735	16.6	0.38	0	0	1.14	0	3.19	0.058	7.56	0.464	0.213	0	0.464
22510	ESAT-6 and CFP-10	10	ND	ND	ND	ND	ND	ND	13.25	ND	ND	ND	ND	ND	ND	ND	ND	ND	ND	ND	ND	ND	ND	ND	ND	ND	ND	ND	ND	ND	ND	ND	ND	ND	ND	ND	ND	ND	ND	ND	ND	ND	ND	ND	ND	ND	ND	ND	ND
22510	ESAT-6 and CFP-10	120	0.24	4.64	7.36	3.66	0.32	0.775	3.185	2.84	0.639	3.37	3.52	1.1	ND	ND	ND	ND	0.16	2.37	16.4	8.06	ND	ND	ND	ND	0	0.637	6.22	2.75	ND	ND	ND	ND	0.431	0.01345	7.65	ND	2.21	ND	ND	0.0269	3.66	0.4455	9.31	ND	5.05	ND	ND
22510	ESAT-6 and CFP-10	150	3.86	6.11	1.97	1.78	2.48	9.363	2.2955	1.88	0	3.33	0.46	0.178	5.2	12.1	4.93	5.01	0	0	3.94	0.888	4.54	15.7	2.87	1.67	0.351	1.11	0.46	0.178	2.34	6.18	2.97	1.04	2.96	0.344	1.48	0.835	0	0.0796	0.656	0.185	1.95	0.3005	0.0974	1.8	0	0.32	1.08
22510	ESAT-6 and CFP-10	180	1.61	4.39	3.16	17.6	0.935	1.8095	0.385	0	0.268	0.432	0.287	0.419	2.81	5.03	5.41	3.17	3.08	1.87	14.2	5.87	2.5	1.83	2.51	1.34	2.28	3.31	16.3	12.6	0.625	2.06	3.09	3.51	0.502	0	0.167	1.24	1.92	0	3.48	0.167	0.515	1.59	0.172	0.667	1.72	0.334	0.667
22510	ESAT-6 and CFP-10	20	0	0	2.84	1.6	3.486	25.9	1.315	2.48	1.6	0	0.875	0.532	0	0.199	1.65	0.922	2.56	0	28	2.13	0.261	0.797	1.24	0.461	0.962	0.958	10.7	3.19	0.261	0	13	9.68	1.09	0.672	3.26	0.254	0	0	0.509	0	4.42	9.84	11.5	0.118	0	0	0.237
22510	ESAT-6 and CFP-10	30	ND	ND	ND	ND	5.37	0.835	8.3	13.65	ND	ND	ND	ND	2.07	2.08	7.47	4.85	ND	ND	ND	ND	5.37	3.33	6.64	6.67	ND	ND	ND	ND	0.826	1.67	12.4	12.7	ND	1.035	ND	0.518	ND	2.59	2.07	ND	ND	0	ND	1.31	ND	1.63	2.29
22510	ESAT-6 and CFP-10	42	7.28	10.4	11.2	15.5	0.4715	0.087	2.455	0.445	9.43	12.9	9.09	11.5	ND	ND	ND	ND	0	0.957	14.7	10	ND	ND	ND	ND	0	0.087	1.99	0.111	ND	ND	ND	ND	3.11	0	5.25	ND	0	ND	ND	0	4.68	0	9.36	ND	0.0767	ND	ND
22510	ESAT-6 and CFP-10	56	5.96	18.3	1.61	2.85	0.1925	0.599	2.655	1.17	2.4	7.74	0.832	1.63	0.249	2.62	1.69	1.24	0	0.573	2.23	1.02	1.24	11.5	2.63	10.8	0.0962	0.287	1.92	3.26	0	8	11.8	12.1	1.9	0.268	1.12	0	0	1.59	0	0	6.76	0.178	2.14	0.228	0.356	3.88	1.07
22510	ESAT-6 and CFP-10	90	0.621	8.27	1.07	4.08	0.171	0.9755	2.795	2.183	0.124	0.602	0.63	0.134	1.2	8.81	1.51	1.27	0	0.451	8.14	3.68	3.02	25.5	1.51	2.54	0.124	0.602	4.75	6.29	0.228	4.4	2.73	5.17	1.25	0.2645	0.537	0.233	0	0.35	0.583	0.0716	3.18	0.078	0.265	1.25	0	0.781	2.34
22610	ESAT-6 and CFP-10	10	0.212	2.25	3.06	22.5	0	0.8415	0.5605	1.143	0.127	0.321	2.37	18	0.249	0.44	4.44	13.1	0.0423	0	2.73	1.38	0	0	0.397	0	0.296	0.161	1.78	2.45	2.6	2.64	5.45	10.6	1.72	0.0277	1.62	0.637	0.0193	0.36	0.0554	0.0579	2.7	0.38	2.7	0.748	0	0.374	0.125
22610	ESAT-6 and CFP-10	120	0.133	11.3	0.524	13.2	12.1495	3.77	15.18	21.975	1.06	15.1	1.79	13.9	5.48	11.7	0.777	0.453	0	0	2.4	2.31	0.366	1.68	2.27	2.52	0.0665	0	2.8	3.7	4.33	7.26	1.73	4.63	0.0811	17.861	0.365	2.95	0	0.205	1.39	0.0406	0.348	6.3	1.05	1.86	0	0.414	3.93
22610	ESAT-6 and CFP-10	150	2.53	4.47	3.06	7.6	0.833	0.5905	2.07	2.99	0.239	0.406	0.846	0.616	1.04	2.95	1.21	2.91	0	0	3.29	1.85	1.33	1.72	0.862	6.8	0.334	0.305	2.45	1.85	0.0416	0	2.87	0.243	1.8	0.1495	0.971	1.54	0	0.039	0.916	0	6.27	0.1349	2.78	1.21	0	0	0.455
22610	ESAT-6 and CFP-10	180	16.9	16.7	8.71	10.4	0.507	9.75	0.1412	0.16	4.74	4.39	2.5	3.79	2	1.5	1.46	2.08	1	0.223	1.98	1.2	6.97	3.65	2.47	1.78	1.87	2.08	7.93	9.38	0.0625	0.0935	1.97	1.19	2.74	0.89965	8.21	0.0774	0.356	0.0967	1.99	0	3.17	13.539	2.95	0	0.109	0	0.625
22610	ESAT-6 and CFP-10	20	1.78	2.69	3.14	6.88	0.5735	0.3625	1.86	0.4395	0.594	2.96	1.31	4.59	1.68	4.35	3.75	4.97	0.365	0	23.7	39.2	0.561	4.59	2.28	9.81	7.9	17.2	4.45	7.77	0.15	0.966	0.375	3.11	0.867	0.494	6.21	0.41	0.347	0.3	0.874	0.751	2.02	0.3485	7.12	1.19	0	1.12	1.34
22610	ESAT-6 and CFP-10	30	ND	ND	ND	ND	0.303	1.65	2.94	7.82	ND	ND	ND	ND	0.346	6.49	3.51	7.21	ND	ND	ND	ND	0.389	7.01	2.1	10.6	ND	ND	ND	ND	0.562	3.92	5.96	15.8	ND	0.0933	ND	0.622	ND	0.0933	2.71	ND	ND	0.265	ND	0.971	ND	0.353	8.56
22610	ESAT-6 and CFP-10	42	2.1	5.46	4.26	17.5	0.3995	3.097	2.82	5.985	1.27	3.64	3.49	14.2	0.166	1.66	2.68	15.2	0.444	0.202	8.72	4.08	0.433	3.98	2.55	16.7	0.356	1.15	2.14	1.66	0.0333	6.63	1.92	8.95	1.28	0.139	2.17	0.647	0.0388	0	1.29	0	3.54	0.16675	6.84	4.3	0	0.127	7.28
22610	ESAT-6 and CFP-10	56	1.16	4.85	5.22	13.6	0.901	2.135	3.655	5.07	0.609	2.68	3.83	10.3	1.62	13.6	10.8	44.2	0.122	0.383	6.18	1.94	3.97	10.4	10.6	35.6	0	0.894	1.6	4.72	0	0	0.562	0	2.39	1.3365	9.12	0.118	0.903	0	0.236	0	12.3	0.6305	23.2	0.756	0.167	0	2.14
22610	ESAT-6 and CFP-10	90	0.127	0.659	6.06	0.89	0.0705	0.142	3.27	0.615	0.127	0.329	4.93	0.297	0.282	0.426	1.97	1.96	0	0	6.6	2.08	2.12	1.84	7.37	4.66	0.381	0.824	6.01	5.34	0	0.284	1.82	0.98	0.388	0.04315	0.388	0.294	0	0	0.22	0	1.49	0	1.49	0	0	0	0.512
22710	ESAT-6 and CFP-10	10	5.73	6.99	7.45	4.88	0.422	1.2484	2.575	0.1868	4.18	3.68	4.97	2.14	2.48	10.7	5.1	6.64	0.455	0.221	5.28	11.5	21.1	32.8	14.6	18.7	0	0	3.26	1.28	0.146	2.23	1.24	1.69	1.96	2.002	1.96	3.22	0.28	0.129	9.54	0	ND	1.69	ND	2.89	ND	1.33	6.63
22710	ESAT-6 and CFP-10	120	1.42	1.97	4.02	2.65	0.6635	1.1915	3.19	4.995	0.825	1.33	1.73	1.58	0.574	1.95	2.62	3.19	0	0.16	4.09	1.77	2.21	5.86	3.22	4.38	0.455	0.693	6.75	4.55	0.221	0.434	4.73	2.79	2.54	0.9855	3.2	4.04	0	1.11	3.76	0.221	5.37	0.3495	8.4	6.28	0.117	0	4.36
22710	ESAT-6 and CFP-10	150	3.62	64.7	1.66	20.6	0.6485	2.289	10.465	3.008	0.906	19.1	0.19	1.25	6.96	25.8	4.85	19.4	0.498	1.96	58.1	6.25	1.35	16.4	0.266	13.1	0.861	6.32	47.9	6.87	0	0	3.74	0	3.68	0.4815	1.53	5.59	0	0	4.55	0	9.69	0.085	5.1	4.47	0	0	4.09
22710	ESAT-6 and CFP-10	180	4.66	5.75	3.73	3.38	2.287	17.145	0.9925	0.9965	14.6	13	5.24	4.91	1.04	1.02	3.25	2.82	0.042	0.307	3.54	1.09	6.22	6.5	4.16	3.42	0.21	0.439	17.8	12.9	0	0.0678	4.65	1.01	4.77	0.5375	13.2	0	0	0	2.08	0	4.6	3.22	9.03	0	0.493	0	0.699
22710	ESAT-6 and CFP-10	20	0.813	3.57	0.499	0.862	0.233	0	0.456	0	0.065	0.17	0.0208	0	0	0	0.241	0	0.163	0	11.3	3.02	0.792	3.05	0.965	1.74	0.0325	0	1.98	0	0	0	0.265	0	0.459	1.35	0.153	0	0	0	1.05	0	1.08	0	0	0	0	0	2.45
22710	ESAT-6 and CFP-10	30	0.602	3.97	3.7	11.7	0.143	0.04035	2.805	0	0.635	3.44	3.81	6.86	0.0506	0	1.33	0	0.0668	0.265	15.8	2.52	0.0253	0	0.589	0.177	0	0.265	4.94	1.83	0	0	1.86	0	1.3	0.4765	1.3	0	0	0	0	0	5.63	0.1585	4.54	0	0	0	0
22710	ESAT-6 and CFP-10	42	4.17	9.93	3.06	4.59	0.2172	2.671	1.6615	5.1765	2.07	13	1.19	3.9	1.94	14.2	3.23	9.16	0	0	3.77	2.06	4.57	24.4	4.34	14.2	0.0656	0	5.33	7.57	0.121	9.05	3.95	5.54	2.11	0.467	2.55	2.33	0	0.123	3.06	0	5.12	1.3045	8.73	3.19	0.301	0.199	5.58
22710	ESAT-6 and CFP-10	56	0.334	0.362	1.77	0.609	1.2355	0.3945	6.6	6.4	1.14	0.966	5.77	2	2.52	2.76	2.61	4.03	0.234	0.0805	13.3	4.74	15	15.5	8.04	12.9	0	0.0805	5.77	3.04	0.723	5.15	8.18	19.5	0.758	1.419	1.67	3.33	0.152	1.39	8.47	0	0.663	0.8965	1.06	1.69	0.265	0.282	3.8
22710	ESAT-6 and CFP-10	90	2.46	13.2	2.05	2.06	1.956	5.215	1.995	4.775	5.25	24.2	3.9	4.19	4.25	30	2.57	5.14	0.219	0.849	12.2	6.72	5.03	23.7	2.43	4.91	1.59	1.91	9.7	14.4	0.959	6.04	5.96	8.34	2.93	0.1	2.39	1.4	0	0	2	0	5.17	0.525	4.06	5.44	0	0	3.14
22810	ESAT-6 and CFP-10	10	4.48	4.29	2.91	6.09	0.685	0.93	0.5375	1.825	8.69	12.3	5.3	7.3	3.15	12.3	4.99	7.78	1.7	0	30.7	8.52	4.32	12.6	4.87	10.5	0.242	0.415	2.47	5.74	0.21	3.51	3.56	9.28	2.33	0.9105	5.77	1.77	1.47	0.0591	2.96	0	4.66	1.268	6.16	4.12	0.499	1.5	8.43
22810	ESAT-6 and CFP-10	120	3.45	6.22	4.84	8.95	2.56	3.095	2.595	6.85	5.76	6.74	7.98	6.48	0.864	2.52	3.93	6.44	0.909	1.3	27.2	29.6	1.4	5.76	2.68	5.29	2.79	2.85	10.9	8.95	0.27	0.36	3.21	2.43	10.1	3.565	12.9	0.965	0	0.322	1.77	0.54	27.1	5.88	20.7	1.6	0	0.639	2.56
22810	ESAT-6 and CFP-10	150	7.1	30.9	2.4	7.97	1.21	2.29	26.35	33.7	2.92	14.9	0.308	3.3	1.47	4.2	1.49	7.35	0.0767	0	26.4	24.7	2.35	8.63	1.13	9.87	0.767	1.15	27.2	27.7	0.718	0	25.1	34.2	3.55	50.0845	3.21	49.7	0	43.2	0.173	0.169	8.1	49.6	4.86	50.4	0	28	0
22810	ESAT-6 and CFP-10	180	10.1	8.77	4.92	6.81	4.6	14.78	0.4885	1.5865	91.2	85.9	83.8	78.3	3.34	2.18	5.66	5.28	0.0229	0.0669	0.22	0.262	3.76	3.35	2.52	3.66	0.114	0.736	15.7	8.12	0.0437	0	5.06	3.25	1.93	1.548	14.4	0.292	0.168	0	0.585	0	2.07	7.275	12.1	0.317	0	0	0.422
22810	ESAT-6 and CFP-10	20	6.01	5.5	4.32	4.61	0.772	1.1655	5.845	10.655	4.15	3.84	3.16	2.7	1.67	6.04	5.25	4.94	0.19	0	8.67	2.78	2.7	7.73	4.4	8.95	1.3	1.81	5.04	5.48	0.134	1.69	6.86	8.02	4.95	1.009	6.92	4.87	0.204	0.263	3.82	0.678	5.1	0.0795	8.12	6.41	0	0.2	8.82
22810	ESAT-6 and CFP-10	30	1.95	6.72	6.88	3.81	0.08955	0	5.38	12.845	0.663	4.13	4.95	0.476	1.54	11.3	5.05	3.79	0.752	0	32.1	15.2	0.634	3.76	2.61	9.09	0.487	0	12.6	21.9	0	0	6.01	15.2	7.92	0.231	11.5	0.92	0	0	3.07	0	9.21	0	10.9	2.21	0	0	4.41
22810	ESAT-6 and CFP-10	42	2.41	5.4	1.66	2.78	0.469	2.79	2.13	11.72	2.38	6.09	1.41	1.94	0.466	2	0.804	1.52	0	0.0574	5.92	6.16	1.4	4.62	0.871	3.69	0.596	1.61	12.5	19.2	0	4.25	2.01	6.51	1.24	0.5545	1.39	0.361	0	0.722	2.17	0	2.41	0.2575	3.78	3.74	0	2.67	5.35
22810	ESAT-6 and CFP-10	56	3.26	4.21	11.2	5.44	0.412	0.3715	9.845	13.25	1.55	2.49	4.55	1.71	2.07	3.74	9.03	4.17	0.768	0.237	20.1	8.08	1.28	1.34	3.3	1.66	0.0148	0	3.34	1.17	0.285	0.802	4.29	4.62	5.25	0.5555	3.67	2.15	0.452	0.613	1.02	0	4.96	0.2205	4.19	2.22	0.11	1.39	0.278
22810	ESAT-6 and CFP-10	90	1.23	6.7	1.06	1.65	0.9035	6.91	2.24	5.9	4.61	16.2	3.34	4.36	2.76	17.2	4.12	6.12	0.461	0.462	10.8	8.95	4.02	20.7	3.09	6.71	0.769	2.31	8.89	14	0.946	8.75	6.01	13.6	0.709	0.5085	0.709	1.55	0	0.662	2.87	0.355	12.5	1.91	11.4	5.49	0	2.2	6.59
22910	ESAT-6 and CFP-10	10	0.534	2.54	0.645	2.67	2.457	7.534	1.1995	3.5335	0.267	1.27	0.33	1.22	2.85	5.08	2.79	5.33	3.47	0.299	7.92	1.7	0.92	4.19	0.779	4.23	1.11	2.77	2.61	5.35	0.171	1.85	0.663	2.04	0.199	2.025	0.298	1.09	3.18	0.182	0.454	0	1.99	1.72	1.09	2.17	0.906	1.63	2.53
22910	ESAT-6 and CFP-10	120	2.03	2.33	5.74	3.32	2.865	8.8	5.485	12.995	2.93	3.91	4.78	2.82	4.65	30	2.83	25.6	0	0.0932	3.46	1.16	0.823	21.8	1.02	22.4	0.3	0.466	2.21	1.49	1.79	6.74	16.3	17.1	4.74	50.0499	4.89	75.7	0	35.9	0.598	0	5.04	49.75	5.81	73.2	0	21.4	0
22910	ESAT-6 and CFP-10	150	1.33	34.9	1.04	15.6	0.5325	0.6	1.136	1.145	0.663	16.4	0.116	3.75	0.273	0	0.429	0	0.387	0	4.37	1.04	6.45	12	3.71	12.1	0.442	1.52	3.62	2.29	0	0	0.339	0	2.26	0.45	0.87	0.204	0.696	0	7.49	0	3.02	0.1095	0.476	0	0	0	9.85
22910	ESAT-6 and CFP-10	180	1.85	5.94	2.18	14.2	1.37	11.62	1.373	10.055	3.83	14.4	4.76	30.3	0.45	0.849	3.1	2.5	0.0722	0	5.37	29.9	0.629	2.26	1.77	2.78	0.795	0.81	1.66	14.4	0.27	0.755	4.55	3.34	3.44	0.5895	0.765	0.0835	0.213	0	0.584	0.128	4.75	4.005	0.153	0.211	0	0	0.105
22910	ESAT-6 and CFP-10	20	3.05	3.44	4.76	6.81	1.1205	0.912	2.63	14.96	2.42	2.72	2.48	4.16	2.2	4.55	3.09	11.9	0.315	0	4.06	1.28	1.07	2.87	1.62	14.9	0.683	0.462	3.2	4.34	0.293	0.778	1.81	11.2	4.96	1.334	1.3	2.19	0.587	0.214	1.66	0.13	4.2	0.1815	1.35	3.17	0	0.59	2.43
22910	ESAT-6 and CFP-10	30	1.04	2.4	2.98	9.3	2.02	2.705	3.23	9.935	1.07	2.33	3.96	4.89	0.303	1.74	3.38	7.28	0.83	0	7.08	3.43	0.363	0.484	0.968	7.71	0.242	0.705	2	5.55	0.484	0.871	3.91	6.21	3.04	1.57	3.5	0.602	0.862	0	3.61	0.172	6.93	0.591	4.01	0.579	0.122	0	3.82
22910	ESAT-6 and CFP-10	42	ND	ND	ND	ND	0.46	4.41	0.921	8.46	ND	ND	ND	ND	1.07	2.67	1.4	7.35	ND	ND	ND	ND	1.84	4.99	1.8	6.99	ND	ND	ND	ND	0.46	5.11	1.16	11.4	1.1	0.191	3.41	1.57	0.0525	0	0.787	0.105	2.59	0.6705	6.7	2.63	0	0.702	1.93
22910	ESAT-6 and CFP-10	56	2.38	0.815	7.67	5.16	0.9155	0.1775	6.61	8.605	1.54	1.02	4.23	2.86	1.73	1.14	6.86	4.19	1.69	0.204	22.7	15.2	2.06	1.9	6.06	2.46	0	0.102	5.42	7.47	0.333	0.634	4.45	4.34	5.33	1.129	2.23	3.04	0.637	0.0845	5.16	0	2.57	0.3403	1.29	2.29	0.351	0	4.49
22910	ESAT-6 and CFP-10	90	2.19	17.4	3.47	11.8	3.4615	10.84	4.055	13.005	4.98	29.9	5.85	19.3	5.09	12.4	4.78	26.5	1.73	0.87	6.94	5.91	4.81	15.1	3.55	18.8	0.398	3.48	4.11	6.3	1.74	5.33	3.5	6.84	3.31	0.255	1.54	1.31	0.118	0	0.914	0.355	9.39	0.1435	4.97	3.44	0	0	2.29
23010	ESAT-6 and CFP-10	10	1.36	15.7	3.89	8.42	6.0145	7.365	5.065	9.9	1.02	11.3	2.01	6.53	3.65	14.1	5.46	14.3	0	0.121	2.99	1.37	1.32	14.5	3.09	14.8	2.13	3.51	11.9	13.1	0.581	5.86	6.5	9.52	2.07	1.02005	2.03	6.34	0.0451	1.22	1.22	0.135	3.18	3.14	3.85	6.88	0.168	3.24	3.64
23010	ESAT-6 and CFP-10	120	1.28	4.72	15.1	9.41	0.6255	3.454	5.1	8.045	2.9	3.86	12	6.18	2.37	5.89	4.88	5.51	0	0.215	7.84	4.84	4.27	12.4	8.1	7.71	0.0853	0	3.08	2.42	0.136	0.478	3.1	1.76	1.9	0.741	2.8	2	0.104	0.0344	55.5	0.0691	4.06	2.0885	3.65	1.4	0.811	0	48.3
23010	ESAT-6 and CFP-10	150	5.12	5.06	3.02	2.3	1.015	3.0755	0.4925	0.1645	2.49	4.41	1.14	0.987	1.23	0.855	1.76	1.04	0.0673	0	2.1	0	2.07	0.778	1.31	0.519	1.01	0.389	1.18	0.987	0.168	0	1.07	0.39	1.89	0.3435	1.47	2.62	0	0.119	0.715	0	1.12	0	0.559	0.654	0	0	0.654
23010	ESAT-6 and CFP-10	180	0.856	0.7	2.85	11.7	2.365	25.45	0.06665	0.755	1.96	6.38	3.93	15	1.58	2.86	5.22	6.12	3.83	1.63	3.16	1.33	0.86	2.34	3.44	7.14	1.46	0.622	3.25	3.67	0.0716	0	4.11	1.02	0.539	0.1225	0.392	0.315	0.735	0	0.189	0.294	0.344	0.2295	0.344	0.23	0.115	0	0.574
23010	ESAT-6 and CFP-10	20	1.67	1.54	5.87	2.13	0.5925	1.095	15.85	9.775	2.63	3.22	5.01	0.948	1.48	2.19	11.3	2.73	0.159	0.129	18.6	7.35	1.07	1.41	6.24	2.55	1.27	1.29	17.2	16.8	0.765	4.06	12.7	6.56	1.65	0.373	1.4	1.2	0	0.332	1.08	0.0825	4.7	0.29	2.68	0.488	0.336	1.22	1.22
23010	ESAT-6 and CFP-10	30	1.83	3.82	5.81	4.64	0.2205	0.6185	6.41	9.045	2.78	6.59	5.63	3.34	1.32	3.51	2.69	2.18	0	0.132	5.18	0.557	0.631	2.66	1.83	1.97	0.0631	0.791	6.18	4.27	0	0.701	2.08	1.31	1.91	0.3925	1.59	1.15	0	0.0358	2.54	0.389	2.76	0.579	2.27	1.41	0	0.188	3.76
23010	ESAT-6 and CFP-10	42	1.02	0.316	5.86	5.24	6.001	15.389	0.23955	0.054	1.02	0.316	2.58	2.65	2.02	6.24	5	4.32	0.0603	0	11.6	7.53	2.49	8.32	2.76	2.38	0	0	6.48	11.9	0.606	3.4	6.09	9.95	4.21	2.105	5.09	0.92	0.0514	0.0766	2.76	0	2.52	2.109	3.41	0.329	0	0	1.64
23010	ESAT-6 and CFP-10	56	1.48	4.39	1.75	3.56	0.394	0.4235	2.205	3.29	2.27	5.62	1.79	3.48	1.04	5.01	1.06	1.07	0	0.527	9.48	5.04	1.37	6.01	1.05	2.48	0.0985	0	2.91	3.3	0.109	2	1.74	3.29	ND	0.251	ND	1.25	ND	0	3.01	ND	ND	1.28	ND	1.61	ND	0.107	2.36
23010	ESAT-6 and CFP-10	90	5.79	5.61	2.42	4.43	0.2076	1.62	2.025	2.1435	0.752	1.55	0.959	0.506	0.068	0.81	1.06	1.04	0	0	3.97	2.15	5.91	13.4	2.36	4.54	0.15	0.193	3.22	2.41	0.136	2.43	4.8	5.1	0.675	0.169	0.394	0.134	0.113	0	0	0.0563	0.384	0	0.192	0	0	0	0.302
23110	ESAT-6 and CFP-10	10	4.8	6.18	3.43	5.35	10.3845	12.98	12.485	22.45	3.95	4.17	2.31	3.46	2.7	17	4.8	8.23	0.0387	0.309	2.72	4.28	2.57	20	3.1	7.15	2.79	3.09	7.33	12.8	1.7	14	6.34	14.1	4.89	1.67	5.81	3.32	0.968	1.39	3.74	0.561	3.55	1.149	3.48	4.33	0.232	2.4	5.53
23110	ESAT-6 and CFP-10	120	1.74	1.73	7.36	5.61	0.558	0.3935	1.465	3.785	6.14	7.71	9.85	8.6	ND	ND	ND	ND	0.186	0.236	31.8	22.5	ND	ND	ND	ND	0.124	0.157	4.59	3.18	ND	ND	ND	ND	19.3	0.114	12	ND	0	ND	ND	0.342	21.4	0.331	16.6	ND	0.166	ND	ND
23110	ESAT-6 and CFP-10	150	1.57	7.98	0.678	0.899	0.736	2.79	30.45	38.7	1.24	5.37	0.377	0.4	1.42	4.25	1.99	3.89	0.619	1.31	57.8	64	1.78	19.4	1.97	16.4	0.524	1.02	32.3	41.8	0.118	0	28.9	34.3	3.11	0.119	3.3	1.59	0	0	1.59	0	4.2	0.1015	5.59	3.66	0	0	2.24
23110	ESAT-6 and CFP-10	20	6.86	9.21	9.63	16.4	2.879	5.58	11.15	24.915	4.36	6.76	7.38	6.99	2.83	4.91	6.61	9.52	0.291	0.294	5.56	2.78	3.06	7.37	4.31	15.3	4.4	4.7	17.1	20.4	1.45	2.8	12.2	12.2	8.35	7.43	13.2	1.27	0.103	4.82	1.8	0.722	8.03	10.84	10	1.67	0	5.44	6.56
23110	ESAT-6 and CFP-10	30	4.12	6.6	5.62	26.1	1.4442	1.6135	9.915	13.75	5.77	6.02	7.71	16.4	0.137	0.748	4.31	1.92	0	0	8.89	2.54	1.3	8.97	4.11	14.3	0.0867	0.363	6.7	5.75	2.26	1.6	25.5	25	2.15	4.8735	2.66	0	0	0.718	3.41	0	4.19	1.3995	2.71	0	0.113	0	6.18
23110	ESAT-6 and CFP-10	42	3.65	9.92	4.57	21	1.655	8.64	10.7	31.75	0.642	1.86	1.66	4.28	0.891	10.3	2.47	13.2	0.0401	0.606	10.9	8.31	0.891	7.31	1.5	13.2	0.2	2.12	4.79	9.29	0.334	12.4	6.74	28.6	1.58	0.461	4.28	0.596	0.0792	0	2.09	0	4.87	1.725	6.67	7.28	0	4.04	11.5
23110	ESAT-6 and CFP-10	56	0.689	1.58	4.91	4.41	0.595	0.3655	2.85	1.93	0.402	1.38	2.64	1.34	0.578	1.68	2.06	3.15	0.23	0.198	6.77	3.57	0.835	2.02	3.29	6.54	0	0.0988	5.33	6.38	0	1.23	5.86	12.9	1.66	0.337	2.05	1.14	0.0977	0.0953	4.29	0	1.62	0.3185	1.46	0.626	0.324	0.104	3.13
23110	ESAT-6 and CFP-10	90	5.34	11.6	8.39	8.61	2.43	16.505	6.455	11.355	2.96	9.78	6.02	4.5	5.24	21.9	4.27	7.79	0	0.362	7.94	5.26	7.05	28.5	3.51	8.28	0.286	0.725	6.91	7.56	1.54	16.4	5.22	8.93	12.5	0.906	2.74	2.77	0	0	1.02	0.456	17.5	1.0715	5.83	5.63	0	0.171	1.71
23210	ESAT-6 and CFP-10	10	6.03	14.6	8.48	10.3	2.0609	0	0.03835	0.021	11.7	26.1	12.5	12	2.85	15.6	3.01	5.32	0.135	0.258	2.87	7.94	2.28	13.8	0.978	1.52	3.26	4.81	3.49	4.5	1.48	10.2	2.23	4.08	1.56	0.0999	3.99	0.709	0.116	0	0.946	0	0.748	0	1.82	0.27	0	0	0.539
23210	ESAT-6 and CFP-10	120	13.2	17	7.73	4.46	0.993	0.139	14.535	12.3	16.8	26.1	8.39	4.46	1.02	5.62	4.34	5.68	0.389	0	15.7	3.77	0.512	4.24	2.94	7.84	0.195	0	19.6	7.63	0.512	1.03	5.23	3.98	3.59	0.876	6.25	0.492	0.998	0.197	0.983	0.333	1.61	0.139	2.52	1.76	0	0	2.04
23210	ESAT-6 and CFP-10	150	12.3	51.1	3.6	6.2	1.92	0	8.445	7.83	9.22	54.2	2.68	6.73	2.43	17.4	2.09	7.91	0.332	0	13	2.51	2.75	34.7	1.11	18.8	0.644	2.48	6.18	2.37	0.458	3.22	16.6	16.7	1.55	0.218	1.82	0.935	0.0536	0	4.11	0	4.12	0	1.68	0.823	0	0	3.09
23210	ESAT-6 and CFP-10	20	3.01	6.11	4.92	4.25	0.3695	0.14	0.181	0	2.47	5.49	3	2.36	1.38	5.19	4.5	7.22	0	0	6.21	0.615	3.2	13.2	3.12	12.5	0.609	0.867	3	2.97	0.993	2.53	3.56	4.33	5.44	0.582	3.28	0.964	0	0.0419	2.22	0	6.31	0.14	3.87	1.61	0	0.07	4.13
23210	ESAT-6 and CFP-10	30	2.39	6.91	4.63	8.54	3.964	0.637	0.0432	0.4065	2.29	4.87	4.63	3.25	0.622	5.1	6.3	5.15	0	0	3.48	1.63	4.35	11	5.12	17	0.0975	0.314	1.66	0.813	1.45	1.42	5.29	5.67	2.07	0.619	5.31	1.19	0	0.254	5.51	0	3.03	0.637	5.72	0.615	0	0	11.8
23210	ESAT-6 and CFP-10	42	1.91	9.03	2	4.97	0.4275	0.571	1.5645	8.255	0.111	2.31	0.282	2.76	0.56	8.46	1.39	3.17	0.0222	0.884	7.1	8.51	0.77	8.72	1.21	3.7	0.444	3.09	2.14	5.75	0.7	9.33	6.4	11.4	2.8	0.363	1.16	0.558	0	0.0698	2.58	0.41	9.96	0.571	5.75	4.82	0	0.851	6.52
23210	ESAT-6 and CFP-10	56	2.34	2.15	5.94	7.77	0.6035	0.7285	2.46	2.45	1.6	2.33	4.97	4.81	3.59	5.7	4.85	5.4	1.23	0.359	8.99	5.1	1.89	3.69	3.3	3.51	0	0	1.89	6.78	0.283	2.18	3.44	10.2	4.62	0.506	3.14	4	1.6	0.0519	2.65	0	4.73	0.7285	2.73	5.17	0.574	0.333	2.67
23210	ESAT-6 and CFP-10	90	3.18	26.4	1.64	3.7	1.6345	0.5205	2.2	5.955	4.34	37.3	2.56	4.6	3.03	18	2.4	5.29	0.119	0.675	8.29	3.32	4.57	21.1	2.73	5.22	0.159	1.57	1.87	3.24	0.666	7.18	5.17	12.3	1.25	0.0745	2.05	4.23	0	0	1.93	0	6.38	0.5205	7.29	6.64	0	0.117	5.01
[truncated: 17 more columns]
