# Supplementary material for: Computational and Empirical Studies Predict Mycobacterium tuberculosis-Specific T Cells as a Biomarker for Infection Outcome
Source: PLoS Comput Biol. 2016 Apr 11;12(4):e1004804. doi: 10.1371/journal.pcbi.1004804 (PMC4827839; doi:10.1371/journal.pcbi.1004804)
Supplement: S11 Table — (PDF) [file pcbi.1004804.s022.pdf]

**Supplementary Table 10:** 49 readouts of the computational model used for PCA.

| Computational Model Variable       | Description                                                            | Computational Model Variable         | Description                                                                                                                 |
|------------------------------------|------------------------------------------------------------------------|--------------------------------------|-----------------------------------------------------------------------------------------------------------------------------|
| <i>Mac</i>                         | Total number of macrophages in the lung compartment                    | <i>LnCM8C</i>                        | Eqn 1.14: Mtb-specific CD8+ Central Memory in the lymph node                                                                |
| <i>T<math>\gamma</math></i>        | Total number of Ty cells in the lung compartment                       | <i>LnEM8C</i>                        | Eqn 1.15: Mtb-specific CD8+ Effector Memory in the lymph node                                                               |
| <i>Tcyt</i>                        | Total number of Cytotoxic T cells in the lung compartment              | <i>BLN8C</i>                         | Eqn 1.16: Mtb-specific CD8+ in the blood                                                                                    |
| <i>Treg</i>                        | Total number of Regulatory T cells in the lung compartment             | <i>BLE8C</i>                         | Eqn 1.17: Mtb-specific CD8+ Effector in the blood                                                                           |
| <i>T<math>\gamma</math>Cognate</i> | Total number of Mtb-specific Ty cells in the lung compartment          | <i>BICM8C</i>                        | Eqn 1.18: Mtb-specific CD8+ Central Memory in the blood                                                                     |
| <i>TcytCognate</i>                 | Total number of Mtb-specific Cytotoxic T cells in the lung compartment | <i>BIEM8C</i>                        | Eqn 1.19: Mtb-specific CD8+ Effector Memory in the blood                                                                    |
| <i>TotMtb.</i>                     | Total CFU/granuloma                                                    | <i>LnN4NC</i>                        | Eqn 1.20: non Mtb-specific CD4+ in the lymph node                                                                           |
| <i>TNF</i>                         | TNF concentration in the Lung compartment                              | <i>LnCM4NC</i>                       | Eqn 1.21: non Mtb-specific CD4+ Central Memory in the lymph node                                                            |
| <i>IL10</i>                        | IL10 concentration in the Lung compartment                             | <i>BLN4NC</i>                        | Eqn 1.22: non Mtb-specific CD4+ Naïve cells in the blood                                                                    |
| <i>CCL2</i>                        | CCL2 concentration in the Lung compartment                             | <i>BLE4NC</i>                        | Eqn 1.23: non Mtb-specific CD4+ in the blood                                                                                |
| <i>LesionSize</i>                  | Lesion size of the granuloma (mm)                                      | <i>BICM4NC</i>                       | Eqn 1.24: non Mtb-specific CD4+ Central Memory in the blood                                                                 |
| <i>APC</i>                         | Eqn 1.1 – Antigen Presenting Cell proxy in the lymph node              | <i>BIEM4NC</i>                       | Eqn 1.25: non Mtb-specific CD4+ Effector Memory in the blood                                                                |
| <i>LnN4C</i>                       | Eqn 1.2: Mtb-specific CD4+ Naïve cells in the lymph node               | <i>LnN8NC</i>                        | Eqn 1.26: non Mtb-specific CD8+ in the lymph node                                                                           |
| <i>LnP4C</i>                       | Eqn 1.3: Mtb-specific CD4+ in the lymph node                           | <i>LnCM8NC</i>                       | Eqn 1.27: non Mtb-specific CD8+ Central Memory in the lymph node                                                            |
| <i>LnE4C</i>                       | Eqn 1.4: Mtb-specific CD4+ Effector in the lymph node                  | <i>BLN8NC</i>                        | Eqn 1.28: non Mtb-specific CD8+ Naïve cells in the blood                                                                    |
| <i>LnCM4C</i>                      | Eqn 1.5: Mtb-specific CD4+ Central Memory in the lymph node            | <i>BLE8NC</i>                        | Eqn 1.29: non Mtb-specific CD8+ Effector in the blood                                                                       |
| <i>LnEM4C</i>                      | Eqn 1.6: Mtb-specific CD4+ Effector Memory in the lymph node           | <i>BICM8NC</i>                       | Eqn 1.30: non Mtb-specific CD8+ Central Memory in the blood                                                                 |
| <i>BLN4C</i>                       | Eqn 1.7: Mtb-specific CD4+ Naïve cells in the blood                    | <i>BIEM8NC</i>                       | Eqn 1.31: non Mtb-specific CD8+ Effector Memory in the blood                                                                |
| <i>BLE4C</i>                       | Eqn 1.8: Mtb-specific CD4+ Effector in the blood                       | <i>T<math>\gamma</math>Recruited</i> | Cumulative number of Tg cells recruited in the Lung compartment                                                             |
| <i>BICM4C</i>                      | Eqn 1.9: Mtb-specific CD4+ Central Memory in the blood                 | <i>TcytRecruited</i>                 | Cumulative number of Cytotoxic T cells recruited in the Lung compartment                                                    |
| <i>BIEM4C</i>                      | Eqn 1.10: Mtb-specific CD4+ Effector Memory in the blood               | <i>Fas_FasL_Kill</i>                 | Cumulative number of macrophage killing due to FAS/FASL apoptosis in the Lung compartment                                   |
| <i>LnN8C</i>                       | Eqn 1.11: Mtb-specific CD8+ Naïve cells in the lymph node              | <i>CTL_Killing</i>                   | Cumulative number of macrophage killing due to Cytotoxic T cells in the Lung compartment                                    |
| <i>LnP8C</i>                       | Eqn 1.12: Mtb-specific CD8+ in the lymph node                          | <i>Mci_Burst</i>                     | Cumulative number of chronically infected macrophage bursting in the Lung compartment                                       |
| <i>LnE8C</i>                       | Eqn 1.13: Mtb-specific CD8+ in the lymph node                          | <i>TcellProlifCum</i>                | Cumulative number of T cell that have been proliferated in the Lung compartment (only Mtb-specific T cells can proliferate) |
|                                    |                                                                        | <i>CFU</i>                           | Total CFU per granuloma                                                                                                     |
